1 Title: Tumor cell phenotype and heterogeneity differences in IDH1 mutant vs wild-type gliomas

2 Short title: Tumor cell phenotype and heterogeneity differences in IDH1 mutant vs wild-type gliomas

3 Michael E. Berens<sup>1¶</sup>, Anup Sood<sup>3,¶</sup>, Jill S. Barnholtz-Sloan<sup>2,¶</sup>, John F. Graf<sup>3</sup>, Sanghee Cho<sup>3</sup>, Seungchan  
4 Kim<sup>4</sup>, Jeffrey Kiefer<sup>1, #a</sup>, Sara A. Byron<sup>1</sup>, Rebecca F. Halperin<sup>1</sup>, Sara Nasser<sup>1</sup>, Jonathan Adkins<sup>1</sup>, Lori  
5 Cuyugan<sup>1</sup>, Karen Devine<sup>2</sup>, Quinn Ostrom<sup>2</sup>, Marta Couce<sup>2</sup>, Leo Wolansky<sup>2, #b</sup>, Elizabeth McDonough<sup>3</sup>,  
6 Shannon Schyberg<sup>3</sup>, Sean Dinn<sup>3</sup>, Andrew E. Sloan<sup>7</sup>, Michael Prados<sup>5</sup>, Joanna J. Phillips<sup>5</sup>, Sarah J. Nelson<sup>6</sup>,  
7 Winnie S. Liang<sup>1</sup>, Mirabela Rusu<sup>3, #c</sup>, Maria I. Zavodszky<sup>3, #d</sup>, Fiona Ginty<sup>3</sup>

8

9 <sup>1</sup>Brain Tumor Unit, Cancer and Cell Biology Division, Translational Genomics Research Institute, Phoenix,  
10 Arizona, United States of America

11 <sup>2</sup>Department of Population and Quantitative Health Sciences and Case Comprehensive Cancer Center,  
12 Case Western Reserve University School of Medicine, Cleveland, Ohio, United States of America

13 <sup>3</sup>GE Research Center, Niskayuna, New York, United States of America

14 <sup>4</sup>Department of Electrical and Computer Engineering, Roy G. Perry College of Engineering, Prairie View  
15 A&M University, Prairie View, Texas, United States of America

16 <sup>5</sup>Department of Neurological Surgery, Helen Diller Cancer Center, University of California San Francisco,  
17 San Francisco, California, United States of America

18 <sup>6</sup>Department of Radiology and Biomedical Imaging, University of California, San Francisco, California,  
19 United States of America

20 <sup>7</sup>Department of Neurosurgery, University Hospitals-Seidman Cancer Center, Cleveland, Ohio, United  
21 States of America

22 <sup>#a</sup>Current Address: Systems Oncology, Scottsdale, Arizona, United States of America

23 #<sup>b</sup>Current Address: Department of Diagnostic Imaging and Therapeutics, UConn Health, Connecticut,  
24 United States of America

25 #<sup>c</sup>Current Address: Stanford University, Department of Radiology, Stanford, California, United States of  
26 America

27 #<sup>d</sup>Current Address: Biogen, Cambridge, Massachusetts, United States of America

28

29 \*Corresponding author

30 Email: mberens@tgen.org

31 <sup>¶</sup> Joint first authors

32

## 33 **Abstract**

34 Glioma is recognized to be a highly heterogeneous CNS malignancy, whose diverse cellular composition  
35 and cellular interactions have not been well characterized. To gain new clinical- and biological-insights  
36 into the genetically-bifurcated IDH1 mutant (mt) vs wildtype (wt) forms of glioma, we integrated  
37 multiplexed immunofluorescence single cell data for 43 protein markers across cancer hallmarks, in  
38 addition to cell spatial metrics, genomic sequencing and magnetic resonance imaging (MRI) quantitative  
39 features. Molecular and spatial heterogeneity scores for angiogenesis and cell invasion differ between  
40 IDHmt and wt gliomas irrespective of prior treatment and tumor grade; these differences also persisted  
41 in the MR imaging features of peritumoral edema and contrast enhancement volumes. Longer overall

42 survival for IDH1mt glioma patients may reflect generalized altered cellular, molecular, spatial  
43 heterogeneity which manifest in discernable radiological manifestations.

44

## 45 **Introduction**

46 Gliomas represent the most common type of malignant brain tumor, comprising 81% of malignant brain  
47 and central nervous system (CNS) tumors and 27% of all brain and CNS tumors in the United States(1).

48 While gliomas are relatively rare in the general population with an average annual age-adjusted  
49 incidence of 6.2 per 100,000, these primary brain tumors contribute significant morbidity and mortality,  
50 with glioblastoma carrying a 5-year survival rate of less than 6%(1).

51

52 The landscape of our knowledge about molecular features required for accurate diagnosis and prognosis  
53 for glioma patients has advanced greatly in the last decade (2-5). Molecular subclassification highlights

54 different genetic underpinnings of glioblastoma (6), which offer some prognostic insight (7), likely

55 attributable, in part, to gene expression patterns influencing vulnerability to radiation (8). The World

56 Health Organization (WHO) classifies gliomas into defined categories based upon histologic and

57 molecular features and are assigned into four grades of increasing aggressiveness. Additionally, the

58 methylation status of O6-methylguanine-DNA methyltransferase (MGMT) has been implicated as a

59 useful biomarker for conferring tumor resistance to alkylating chemotherapies; methylation of the

60 MGMT promoter leads to transcriptional silencing of MGMT, which is associated with loss of MGMT

61 expression and increased response to alkylating chemotherapies such as temozolomide (TMZ) (9).

62 Analysis of DNA methylation from gliomas identified a DNA methylation-based phenotype, G-CIMP,

63 which is characterized by global hypermethylation of CpG islands and is predictive of increased survival;

64 this G-CIMP phenotype is associated with isocitrate dehydrogenase (IDH) mutation status (3, 4, 10).

65  
66 *IDH* wild type (wt) in histologically defined low-grade gliomas is associated with poor clinical prognosis  
67 that more resembles glioblastoma multiforme (GBM), which generally lack *IDH* mutation (IDHmt) (3, 11).  
68 Conversely, *IDH* mutations are observed in the majority of lower-grade gliomas and are associated with  
69 better clinical outcomes. In low-grade gliomas with *IDH* mutations, 1p/19q codeletion is further  
70 associated with oligodendrogliomas and better chemotherapeutic response (12). The validation of some  
71 of these molecular biomarkers for diagnosis and prognosis has prompted WHO to include molecular  
72 subclasses into their latest classification schema for CNS tumors, including addition of MGMT  
73 methylation and IDH-mutant/IDH-wildtype classifications for glioblastoma, as well as IDH-mutant and  
74 1p/19q-codeleted classifications for oligodendrogliomas and anaplastic oligodendrogliomas (13).  
75 Intratumoral heterogeneity, even across molecular subtypes, is now also appreciated as a characteristic  
76 of glioma and glioblastoma (14) and has been shown to occur temporally (15), spatially (16) (17), for  
77 oncogenic drivers (18), and through the stem cell lineage (19). Heterogeneity features have been  
78 identified by radiologic imaging with quantitative features, including distinguishing between IDH1mt vs  
79 wt gliomas(20) . While these and other studies have interrogated glioma heterogeneity using bulk  
80 transcriptomics and single cell sequencing, medical imaging has also provided valuable heterogeneity  
81 insights (albeit limited by resolution e.g. 1 voxel, the volumetric unit, in a 1.5 T MRI image contains  
82 approx. 1-2 million cells). There have been no investigations to date of cell-level spatial heterogeneity in  
83 protein expression or cell types and how they relate to the radiological appearance of these tumors on  
84 MRI. Understanding malignant progression in IDH1 mt and wt patients at multiple scales and in a spatial  
85 context is pivotal to delineating biological events underlying glial tumors and may facilitate tailored  
86 treatment approaches as well as reveal new therapeutic targets. Moreover, this multi-scale  
87 characterization may facilitate the identification of quantitative metrics derived from non-invasive  
88 imaging, i.e. MRI, which correlate with or predict molecular and cellular phenotypes. Such metrics may

89 be evaluated for new patients prior to biopsy or surgery and might inform about the presence of certain  
90 cellular characteristics that may affect treatment response or outcome.

91

92 To discern multimodal differences in relation to IDHmt status, we conducted a multiscale interrogative  
93 workflow which combines multiplexed immunofluorescence and single cell spatial analysis of fixed  
94 glioma tissue, bulk genomic tumor sequencing, MR imaging quantitative features of the whole tumor  
95 and subregions, and patient outcomes. Multiscale datasets were assembled from treatment-naïve cases  
96 of grade 2, 3, and 4 astrocytoma/oligodendroglioma (n=20, referred as treatment-naïve glioma) as well  
97 as from recurrent (previously-treated) grade 4 astrocytoma (glioblastoma) (n=16, referred as recurrent  
98 GBM). Tumor tissue punches from diagnostic paraffin blocks were assembled in duplicate (glioma) or  
99 triplicate (recurrent GBM) into tissue microarrays for multiplex immunofluorescence staining (21) using  
100 43 markers to identify cell types and functional states corresponding to cancer hallmarks (22). Exome  
101 sequencing data was processed for mutations, copy number aberrations, as well as insertions and  
102 deletions. Deconvolution of gene expression data from bulk tumor specimens afforded comparisons of  
103 protein levels and transcript levels across cognate specimens. An expert neuroradiologist (LW) outlined  
104 on MRI of the treatment naïve glioma, and of recurrent GBM (SJM), while advanced deep learning  
105 methods were utilized to delineate necrotic and enhancing cores, as well as peri-tumoral edema.  
106 Morphologic features assessed the volumes of the different regions and their ratios, while simple  
107 features, T1 weighted post contrast (T1 Post), Apparent Diffusion Coefficient (ADC), and Fluid  
108 Attenuated Inversion Recovery (FLAIR), were extracted from different MRI protocols.

109 Various MRI-focused studies (23-26) have investigated the ability of imaging features to predict IDH1  
110 mutational status. Studies focused on assessing the tumor volume, contrast enhancement status (27),  
111 Visually Accessible Rembrandt Images (Vasari) feature set (28, 29), radiomics features (30) or features  
112 that were derived via convolutional neural networks (31), among others and used these to train

113 predictive models of IDH1 mutational status. These studies showed great ability to predict IDH1  
114 mutational status with accuracies as high as 89.1% and area under the receiver operator curves (AUC) of  
115 0.95. Other radiogenomic studies have revealed the correlation of IDH1 mutational status with hypoxia  
116 induced angiogenesis and identified that the relative cerebral blood volume (rCBV) MRI was able to  
117 predict IDH1 mutations status with an 88% accuracy (32). Unlike the latter studies that predict IDH1  
118 mutational status, we seek to reveal correlations between MRI derived quantitative features, cellular  
119 composition and spatial cellular heterogeneity to understand the mechanism of disease progression in  
120 relation to IDH1 mutational status. Such knowledge could enable creation of predictive models on MRI  
121 of disease progression or treatment response without the need for an invasive biopsy.

122 We show lower cell-level protein expression in IDH1mt vs wt cases. Further, IDH1mt gliomas,  
123 irrespective of grade, showed greater spatial heterogeneity but lower molecular heterogeneity of  
124 biomarkers associated with angiogenesis (VEGR2, CD31, SMA, S100A4) and invasion (n-cadherin, cofilin,  
125 collagen IV, GFAP and vimentin). Similarly, cell classes derived from deconvolution of bulk gene  
126 expression data showed the cell class with high expression of most hallmark genes, particularly those  
127 belonging to enabling replicative immortality, evading growth suppressors and inducing angiogenesis,  
128 were significantly under represented (<10%) in the IDHmt tumors. IDH mutation was co-expressed with  
129 ATRX mutations and was mutually exclusive of EGFR and PTEN mutations consistent with known tumor  
130 biology. Longer overall survival following diagnosis for IDH1mt glioma patients may reflect generalized  
131 altered cellular, molecular and spatial heterogeneity, which is also reflected in the MR images as lower  
132 enhancement and higher edema.

## 133 **Materials and Methods**

### 134 **Patient cohorts**

135 Cohorts of 20 treatment-naïve gliomas (grades 2, 3, and 4 from the Ohio Brain Tumor Study) and 16  
136 post-treatment recurrent glioblastoma (grade 4 from University of California San Francisco(33)) were  
137 retrieved based on appropriate patient consent, suitable MR images, FFPE tissue availability, and  
138 specimens suitable for next-generation sequencing (**Table 1 for patient summary and S-Tables S-1 and**  
139 **S-2 for additional details).**

140 **Table 1: Summary of patient characteristics of glioma and recurrent GBM cohorts**

141

142

143

144

145

146

147

148

149

150

151

152

153

154

155

156

157

158

| Cohort                                  | Treatment naïve primary glioma patients | Recurrent/Refractory GBM patients |
|-----------------------------------------|-----------------------------------------|-----------------------------------|
| Patient number                          | 20                                      | 16                                |
| Median (range) age at diagnosis (years) | 57 (26-77)                              | 51 (29-66)                        |
| Gender                                  |                                         |                                   |
| Male                                    | 12                                      | 12                                |
| Female                                  | 8                                       | 4                                 |
| Ethnicity                               |                                         |                                   |
| Caucasian                               | 18                                      | 15                                |
| Hispanic, Asian, African American       | 0,1,1                                   | 1,0,0                             |
| Histologic grade                        |                                         |                                   |
| II                                      | 5                                       | -                                 |
| III                                     | 7                                       | -                                 |
| IV                                      | 8                                       | 16                                |
| IDH1/2 mutation status                  |                                         |                                   |
| Mutant (IDH1 R132H)                     | 8                                       | 3                                 |
| Wildtype                                | 12                                      | 13                                |
| 1p19q codeletion                        |                                         |                                   |
| Codeletion                              | 4                                       | -                                 |
| Non-codeletion                          | 11                                      | -                                 |
| Not available                           | 5                                       | -                                 |
| Median (range) survival (days)          |                                         |                                   |
| Grade II                                | 1120 (420-2326)                         | -                                 |
| Grade III                               | 487 (370-2964)                          | -                                 |
| Grade IV (GBM)                          | 438 (222-541)                           | 1031 (396-3771)                   |

159

160

## 161 **Workflow for multi-modal data generation and integration**

162 Using the methods provided below, three parallel analytical interrogations of the treatment-naïve  
 163 glioma and recurrent cases were pursued: multiparametric MRI; multiplexed immunofluorescence tissue  
 164 imaging; and RNA and DNA sequencing. **Fig. 1** depicts the overall workflow for this multi-modal data  
 165 generation, including multiple analytical approaches to cluster and differentiate clinically variable  
 166 phenotypes. Given the two cohorts of different clinical characteristics and the multi-modal nature of  
 167 the data, our analysis was performed stratified by cohort, yet we aimed at identifying associations that  
 168 are consistent across the two cohorts.



169 **Fig. 1. Overall workflow for generating multi-scale, multiparametric data, extraction of**  
170 **various features and/or conversion to higher scales and multiple analysis approaches**  
171 **to differentiate clinically variable phenotypes.** Multi-parametric MRIs (Panels A & B)  
172 were segmented for ROIs and various image features to characterize tumor and  
173 subregions (necrosis, enhancing and edema) within the tumor. Multiplexed  
174 immunofluorescence tissue analysis (Cell DIVE) (Panel C) provides (left-to-right) a virtual  
175 H&E (vH&E), which is a pseudo-colored DAPI and AF image, and corresponding overlays  
176 of 46 markers (examples shown are for proliferation and angiogenesis markers). Single  
177 cell data were generated for every multiplexed marker and intensity binned into 3 tiers  
178 (low, medium or high) for each cell. Cell level biomarker data was integrated with  
179 known biological pathways knowledge base and used to compute molecular states of  
180 individual cells. For visualization purposes, the molecular state of a cell is overlaid on the  
181 vH&E image (Panel D). Genomics data (Panel E & F), including IDH1 mutation status,  
182 were summarized into pathways, cancer hallmarks, and enrichments for each tumor.  
183 Cell-level and MRI feature data were clustered across all glioma patients and by IDH 1  
184 status (Panel G); finally, molecular and spatial heterogeneity were analyzed relative to  
185 IDH1 mutation status or tumor grade (Panel H).

186

## 187 **Multiplexed immunofluorescence imaging of disease and cellular** 188 **biomarkers**

189 Using the original diagnostic FFPE tissue blocks of each case studied, dual (treatment-naïve glioma) or  
190 triplicate punches (recurrent GBM) were selected for tissue microarray (TMA) construction and  
191 subsequent multiplex immunofluorescence staining and imaging (MxIF). Two replicate slides were used

192 for the treatment-naïve glioma TMAs and 3 replicate slides were used for the recurrent GBM TMAs.  
193 Control cores (2 per cancer type) were included on all slides for glioma, prostate, melanoma, lung,  
194 breast cancer to verify antibody performance. Briefly, the Cell DIVE™ platform (GEHC), which allows in  
195 situ probing of up to 60 biomarkers in a single 5um FFPE TMA tissue section, followed by image  
196 processing, registration and single cell analysis, was used (21) (**S1 A-C Fig.**). After a two-step antigen  
197 retrieval step, the sample underwent repeated cycles of staining, imaging and dye signal quenching (**S1-**  
198 **A Fig.**) for a total of 43 biomarkers (**S3 Table**), representing members of different cancer hallmarks, cell  
199 lineage and cell segmentation(22). Markers of iron metabolism were also included as ferroptosis is an  
200 emerging field of study with mechanistic ties to glioma cell resistance to therapy (34-36). Antibody  
201 clones, staining concentrations and staining sequence are provided in **S3 Table**. The detailed process for  
202 antibody validation (testing, conjugation and verification) is described in **S2 Fig.** and described in S  
203 information of Gerdes et al (21). Prior to storage, images are automatically processed for illumination  
204 correction, registration from multiple rounds using the DAPI image acquired in each round and  
205 background (tissue autofluorescence, AF) removal by subtracting the image of tissue acquired prior to  
206 staining from the image after staining (**S1-B Fig.**).

207

## 208 **Image quality checks, processing and cell segmentation**

209 Staining quality of all multiplexed images was assessed by visual assessment of staining patterns of  
210 individual markers in all samples and compared to controls and/or expected patterns. Since replicate  
211 slides were also available, staining intensities were compared across slides. Staining profiles between  
212 the treatment-naïve glioma and recurrent GBM cohorts were also compared. Markers that failed or had  
213 non-specific staining or very low or negative expression across the whole cohort were excluded from  
214 analysis (**S3 A-C Fig.**). The single cell analysis workflow consists of segmentation and quantification steps

215 **(S1-C Fig.)**. First, image background was suppressed using top-hat filtering followed by multi-level image  
216 thresholding. Second, nuclei were segmented using a wavelet-based algorithm that uses both nuclei  
217 intensity and shape (blobness) information (37). Nuclear segmentation was followed by whole-cell  
218 segmentation, where synthetic cell boundary was extracted by applying Voronoi tessellation using the  
219 nuclei as seeds. To avoid producing very large cells from isolated nuclei, a constraint on the maximum  
220 distance between the nucleus and the corresponding cell boundary was applied. Segmented images  
221 were visually assessed for segmentation quality and compared with images of DAPI staining and virtual  
222 H&E (generated from pseudo-color overlays of DAPI and tissue AF). A single image (1 of 40 (treatment-  
223 naïve glioma) failed segmentation due to poor tissue quality. Five images (of 46 total images) from  
224 recurrent GBM patients were removed from analysis as these cores contained few (<10%) tumor cells or  
225 were cauterized.

226

227 The cell segmentation steps were followed by quantification of biomarker intensities in each cell, as well  
228 as cell features and morphological properties. The entire set of cell-based measurements, including their  
229 IDs and spatial coordinates, are saved as .csv files for statistical analysis in R. For each tissue core, image  
230 registration quality was determined based on DAPI correlation with baseline round. Further, using  
231 correlation of DAPI signal at cell level from each staining/imaging round, a quality score was generated  
232 for every cell in each image, which ranges from 0-1 (0 being no registration, up to 1 for perfect  
233 registration). Only cells with quality score above 0.85 were included in the analysis. Scores below 0.5 are  
234 generally due to tissue shifting/movement and loss. Excellent correlations **(S4 Fig.)** in number of cells  
235 per replicate slide were found for the replicate treatment-naïve glioma TMAs and 2 of the recurrent  
236 GBM slides (>0.98). Slightly greater cell heterogeneity was found for one of the recurrent GBM slides but  
237 slide to slide correlation was still high (0.74).

238

## 239 Identification of cell clusters and biomarker co-expression

240 After exclusion of segmentation markers and single-cell MxIF markers which failed QC or staining criteria  
241 as described above and shown in **S3 Fig.**, unsupervised cell clustering was performed with all the  
242 remaining markers (n=24) using data from reported subcellular staining location (compartments used,  
243 shown in **S3-A Fig.**). In total, 85,767 cells (from 20 treatment-naïve glioma cases) and 56,304 cells (from  
244 recurrent GBM cases) remained for analysis. Separately, clustering was also conducted with smaller  
245 subsets of markers representing individual hallmarks (angiogenesis, proliferation, invasion and motility).  
246 Log<sub>2</sub>-transformed median cell intensity for each marker was used for K-means clustering. After trimming  
247 to reduce the impact of extreme outliers at both 2.5% tails, and since the distribution of marker  
248 intensity/expression values varies significantly within and between marker type, median cell biomarker  
249 values were standardized by the overall marker mean and standard deviation.

250  
251 Cells were clustered into K groups based on the multi-dimensional marker space (equivalent to number  
252 of markers used for clustering). The *kmeans* function provided by *stat* package of *R* (v. 3.4.1) was used  
253 with K (= 2 to 15). We used 10 random starts (*nstart* = 10) to address K-means clustering algorithm's  
254 sensitivity to initial seeds. We also used multiple metrics to determine the best number of clusters for  
255 the data such as Silhouette width, Calinsky criterion, Sum of squares of errors, and consensus clustering  
256 metrics. For consensus clustering (*R* ConsensusClusterPlus package), a subset of 5,000 randomly  
257 selected cells (due to computational constraints) were used. Consensus clustering iterates the clustering  
258 algorithm and examines if each pair of samples consistently clusters together or not. K-means clustering  
259 with Euclidean distance as metric was used for 1,000 iterations with 80% resampling. The cumulative  
260 distribution function (CDF) plot and the heatmap from consensus clustering were evaluated to guide us  
261 to determine the best number of clusters, aided by other metrics mentioned above. For a given K, each  
262 cell was assigned to one of the K clusters, and each tumor sample represented according to the

263 proportion of cells belonging to one of the K clusters. For the purposes of data visualization and  
264 interpretation, data was aligned by cluster, IDH1 mutation and patient ID. Biomarker intensities were  
265 grouped by cancer hallmarks (invasion; energy metabolism; angiogenesis; stem cells; immune response;  
266 proliferation; resisting cell death; DNA damage) and iron metabolism.

## 267 Exome and RNA Sequencing

268 Tumor and normal whole-exome sequencing and tumor RNA-sequencing data from the 20 treatment-  
269 naïve gliomas was studied; data was either produced from fresh-frozen tissue (n=16, 8 of which had  
270 been sequenced in The Cancer Genome Atlas) or from FFPE tissue (n=4) (**S1 Table**). Twelve of these  
271 were newly accessed for de novo analysis, and the remaining data was already available. Pathology  
272 estimates suggested those 12 samples all had greater than 70% tumor cell density and less than 50%  
273 necrosis. Data from sixteen post-treatment recurrent fresh-frozen glioblastoma tumors previously  
274 sequenced as part of a clinical trial (33) (data available in the database of Genotypes and Phenotypes  
275 (dbGaP) under accession number phs001460.v1.p1) was also included (**S2 Table**). All 16 of these tumors  
276 had whole-exome sequencing data, and fourteen had cognate RNA-sequencing data available.

277  
278 Constitutional DNA from PBMCs was available for all 36 samples. For the eight fresh frozen glioma  
279 samples, Qiagen AllPrep DNA/RNA Mini Kit (cat#80204) was used to isolate DNA and RNA; for the four  
280 FFPE treatment-naïve glioma samples, Qiagen AllPrep DNA/RNA FFPE Kit (cat# 80234) was used. Exome  
281 libraries were constructed from 200ng of DNA (DIN=3-5 for FFPE samples, DIN >8 for blood and fresh  
282 frozen samples) using KAPA Biosystems' Hyper Prep Kit (cat#KK8504) and Agilent's SureSelectXT V5  
283 baits, containing custom content, following the manufacturer's protocols. Custom bait content included  
284 copy number probes distributed across the entire genome, along with additional probes targeting tumor  
285 suppressor genes and genes involved in common cancer translocations to enable structural analysis. For

286 high quality RNA (RIN>6.0, DV200>90%), RNA libraries were constructed using Illumina's TruSeq RNA  
287 Library Preparation Kit V2 (cat#RS-122-2001) with 500ng inputs. For remaining RNAs (RIN<6,  
288 DV200>30%), libraries were prepared using Illumina's TruSeq RNA Access Library Prep Kit (cat#RS-301-  
289 2001) with either 40ng or 100ng inputs following the manufacturer's protocol and sample quality/input  
290 recommendations. Libraries were equimolarly pooled, quantitated, and sequenced by synthesis on the  
291 Illumina HiSeq 4000 for paired 82bp reads. FASTQ were aligned using bwa-mem (version 0.7.8) to the  
292 reference genome from 1000 Genomes project build hs37d5 with decoy contigs [b37d5] and Ensembl  
293 v74 for annotations. Somatic variants were called using lumosVar2 (38). For this study, a tumor-normal  
294 mode was used which the sample fraction of clonal variant groups is set to zero in the constitutional  
295 sample.

## 296 **Deconvolution of samples into cell classes from RNAseq data of bulk** 297 **samples**

298 Multiple cell classes, characterized by different dominant biological processes, can be discerned by  
299 computational deconvolution of bulk gene expression data obtained from complex samples (39, 40).  
300 This approach is a practical alternative when available samples are not suitable or available for single-  
301 cell sequencing (scRNAseq). Deconvolution assumes that the analyzed sample is composed of a certain  
302 number of cell types or different cell states, called *classes*. These classes do not necessarily fall into  
303 mutually-exclusive cell types. Instead, they represent quantifiable components of the analyzed samples  
304 that exhibit distinct gene- or pathway-attributable behaviors. We employed the previously published  
305 CellDistinguisher algorithm to identify sets of genes that are expressed predominantly in one class  
306 relative to the others (41). As demonstrated in the Results, gene sets of ~50 genes led to robust  
307 assignments of cells into three classes. These distinguisher gene sets were then used to derive class  
308 signatures and compute sample compositions (fractions of cell types or classes in each sample) using the

309 SSKL algorithm from the CellMix package (42). To validate and support our findings with the multiplexed  
310 single cell data, we also explored how well cell type assignments based on gene expression data  
311 compared to those based on protein expression measured by MxIF.

312

## 313 **Calculation of molecular and spatial cell heterogeneity metrics**

314 Molecular and spatial heterogeneity metrics were computed for the MxIF spatially resolved cell data  
315 using a previously published heterogeneity analysis algorithm (MOHA) (43). As described in more detail  
316 below, this technique computes the molecular “state” of each cell in a tissue section based on the  
317 fluorescence intensity of proteins within a given pathway, gene set or cancer hallmark (22). Spatial  
318 “states” is a summated score which depicts the degree to which adjacent cells are of the same  
319 molecular state. The MOHA algorithm computes heterogeneity (or similarity or divergent states)  
320 metrics based on the distributions of these molecular and spatially defined states.

321

322 The molecular state of a given cell was defined as an ordered set of the values for each individual  
323 marker. A complete list of the cancer hallmark gene sets and the markers that were assigned to them is  
324 shown in **S3 Table**. The state of each marker was quantized into an ordinal value representing either a  
325 high, medium or low state, using the 33<sup>rd</sup> and 67<sup>th</sup> quantiles as the thresholds. The specific ordering of  
326 the markers in a given gene set (i.e. concatenation sequence) is arbitrary but was maintained  
327 consistently throughout the analysis. This process of computing the molecular state was repeated for  
328 each cancer hallmark marker set and for each cell. Next molecular heterogeneity metrics were  
329 computed as a normalized Shannon’s entropy of molecular states:

330

331 
$$\text{Molecular Heterogeneity} = \frac{-\sum_{i=1}^{Nm} Pm_i \ln(Pm_i)}{\ln(Nm)}$$

332 The  $Pm_i$  is the fraction of cells in molecular state  $i$ , and  $Nm$  is the number of possible molecular states in  
333 the system. The number of possible states for a gene set was defined as three raised to the power of the  
334 number of markers assigned to the gene set (e.g.  $3^{\text{number of markers}}$ ). The molecular heterogeneity  
335 metric value can range from zero to unity (i.e. maximum heterogeneity). For each patient tissue sample,  
336 a molecular heterogeneity metric was computed for each cancer hallmark.

337 Cell Spatial Heterogeneity is a summated score which depicts the degree to which adjacent cells are of  
338 the same molecular state as that of an index cell, with each cell in the tissue section serving as an index  
339 cell (Example shown in **S5 Fig.**). Identifying neighboring cells is necessary for computing the spatial  
340 heterogeneity metrics. Two cells were classified as neighbors if the Euclidean distance between the  
341 centers of the two cells was less than 1.3 times the sum of their radii. The cell radii were computed from  
342 the segmented cell area after approximating the cell as a circle. The spatial state metric was computed  
343 by surveying the neighbors of each cell and counting only the number of neighbors in the same  
344 molecular state. This number of neighbors represents the cell spatial state for each pathway or gene set.  
345 Having no neighbors in the same molecular state is a valid cell spatial state. Therefore, the cell spatial  
346 state can range from zero to the maximum number of neighbors a cell has. After going through every  
347 cell and their neighbors, a frequency distribution was established for these cell spatial states. The cell  
348 spatial heterogeneity was then computed as a normalized Shannon's entropy of spatial states:

349 
$$\text{Cell Spatial Heterogeneity} = \frac{-\sum_{k=0}^{Z_{max}} P_{S_k} \ln(P_{S_k})}{\ln(Z_{max} + 1)}$$



350 where,  $P_{s_k}$  is the probability of state  $k$ , and  $Z_{\max}$  is the maximum number of neighbors a cell can have as  
351 measured in the tissue sample. For each patient tissue sample, a spatial heterogeneity metric was  
352 computed for each cancer hallmark.

## 353 **MRI imaging protocols and image feature extraction**

354 The multi-parametric MRI (mpMRI) exams of the brain consisted of T2-weighted (T2), T1 weighted pre-  
355 contrast (T1 Pre), T1 weighted post contrast (T1 Post), Apparent Diffusion Coefficient (ADC) derived  
356 from diffusion-weighted imaging (DWI), and Fluid Attenuated Inversion Recovery (FLAIR) images. The  
357 subjects with recurrent GBM were imaged using 3 Tesla GE scanners, while the treatment naïve subjects  
358 were imaged at a different institution using 3 Tesla Siemens scanners. Although the acquisitions were  
359 consistent in sequence types across institutions, parameters such as relaxation and echo times were  
360 different, thus prompting separate image analysis for the two cohorts.

361  
362 Tumor annotations on the MR images were manually outlined by an expert neuroradiologist to depict  
363 the extent of the whole tumor, including peritumoral regions, relative to the FLAIR sequence. To the  
364 extent possible, an equivalent normal region on the contra-lateral side of the brain was demarcated. A  
365 deep learning approach was trained on the Brain Tumor Segmentation (BraTS) challenge data (44) and  
366 was utilized to divide the whole tumor segmentation into enhancing core and necrotic core based on T1-  
367 post contrast MRI. A U-net network was trained using the T1 Post contrast MRI to identify the extent of  
368 the enhancing and necrotic cores on the BraTS data. The training code and trained model are available  
369 ([https://github.com/mirabelarusu/deep\\_learning\\_inference\\_browser](https://github.com/mirabelarusu/deep_learning_inference_browser)). The trained model was  
370 subsequently applied on the T1 post contrast MR images for the patients in our cohort to segment the  
371 enhancing and necrotic cores. The peri-tumoral (edema) regions were obtained by subtracting the  
372 enhancing and necrotic core from the whole tumor segmentation. Manual corrections and automatic

373 postprocessing were utilized when appropriate to improve the precision of the annotations or remove  
374 minor disconnected regions. At the completion of these processing steps, an annotation of the whole  
375 tumor, the peritumoral (edema) region, enhancing core, and necrosis were obtained for each subject  
376 relative to the FLAIR protocol.

377 Pre-processing steps were applied on the mpMRI prior to feature extraction, including spatial  
378 registration to align the FLAIR protocol relative to the others, in order to project the region annotations  
379 on the rest of the protocols. Intensity normalization was applied in the entire organ by using the normal  
380 regions as reference. Specifically, the intensities were normalized such that the average intensity in the  
381 normal region had a value of 1. To perform this normalization, we divided the intensity of each voxel by  
382 the average of intensities within the normal region.

383 Image derived quantitative features were evaluated for each subject. Due to the limited number of  
384 subjects in our study, the large number of protocols (n=5) available for each subject and the multiple  
385 subregions available for each tumor (n=4), we chose to consider only three protocols (T1-post, FLAIR  
386 and ADC) and three tumor subregions (the whole tumor, the peritumoral edema and enhancing core).  
387 We represented the tumor subregions by two image-derived quantitative features (mean and standard  
388 deviation), resulting in 18 image-derived features per subject. Also, for each subject, we included three  
389 morphologic features (the volume of the enhancing core, the volume of the entire tumor and their ratio  
390 – which we refer to as the normalized enhancing core volume).

## 391 **Multimodality data integration and clustering**

392 Finally, we investigated the associations between imaging quantitative features and other variables  
393 including cell cluster data, clinical parameters and cancer hallmarks based on cell protein expression,  
394 RNA and DNA. Due to the different source and scales of the multimodal data (clinical, MxIF, genomic,  
395 MRI), we discretized the most relevant features into “low”, “medium” and “high” groups, based on the

396 data ranges across the individual cohorts. Features were considered to be relevant for the multimodal  
397 association analysis either because there were clinically utilized for decision making, e.g. IDH1 mutation  
398 status, age, and grade, or because they showed consistent trends across both treatment naïve subjects  
399 as well as recurrent GBM subjects. Based on the discretized variables, subjects were then clustered  
400 using hierarchical clustering with the Euclidean distance metrics.

## 401 **Results**

### 402 **Marker expression differences between IDH1 mt and wt tumors**

403 Univariate and multivariate analysis of biomarker expression in the treatment-naïve glioma cohort  
404 showed significant differences in the mean expression of vimentin ( $p=0.0002$ ), VEGFR2 ( $p=0.0002$ ),  
405 Nestin ( $p=0.003$ ), Ki67 ( $p=0.006$ ) and HLA1 ( $p=0.008$ ) proteins between the IDHmt and IDHwt tumors  
406 (**S6-A Fig.**). Three of these, VEGFR2, Vimentin and HLA1 were also included in the multi-variate model  
407 using Random Forest which provided an AUC of 0.87 (error rate 5%) in predicting IDH mutation status  
408 (**S6-B Fig.**). Since a majority of IDHmt tumors are derived from oligodendrogliomas which minimally  
409 express vimentin and IDHmt tumors are known to have suppressed angiogenic pathways, differential  
410 expression of VEGFR2 and vimentin between IDHmt and IDHwt is not surprising.

411

### 412 **Cellular and genomic analysis shows cancer hallmark differences in**

#### 413 **IDH1 mt vs wt tumors**

#### 414 **Cellular differences in IDHmt vs wt tumors**

415 In total, 24 markers across 85,000 cells from the 20 treatment-naive glioma cases underwent k-means  
416 clustering. **Fig. 2** shows unsupervised clustering and segregation of the cells into 7 clusters; marker

417 intensity organized by cluster, IDH1 mutation and cancer hallmarks (invasion; energy metabolism;  
418 angiogenesis; stem cells; immune response; proliferation; resisting cell death; DNA damage) and iron  
419 metabolism. Relative biomarker intensities (compared to population mean) for each cluster are shown  
420 in **S7 Fig**. Clusters 1 and 4 with above average expression of most hallmarks were composed of cells  
421 from just two IDH1wt patients (**Fig. 2**). Clusters 2 and 6 contained the largest numbers of cells (21.0%  
422 and 21.9%, respectively, **S7 Fig**.) from the greatest number of cases (12 and 11 cases, respectively, **Fig.**  
423 **2**), cluster 2 being dominantly composed of cells from IDH1wt tumors while cluster 6 contained cells  
424 exclusively from IDHmt cases. Cluster 2 shows lower expression of  $\gamma$ H2AX, Sox2, SMA, and Ncad and  
425 higher expression of FTL and FTH1, while most other protein expression was near average of the all  
426 clusters. Cluster 6 had lower expression of most of cancer hallmarks (**S7 Fig**.) and only pERK, CD31 and  
427 Ncad had slightly above average expression. Clusters 5 with lower than average expression of all  
428 hallmarks and cluster 7 with above average expression of most hallmarks were evenly occupied by cells  
429 from both IDHwt and IDHmt cases. Notably, both angiogenesis and metabolism-related markers were  
430 lower in IDH1mt cases, as was expression of antigen presenting machinery, i.e. HLA1, and invasion  
431 markers collagen IV and vimentin. Lower expression of vimentin is consistent with IDH1 mutant tumors  
432 originating from oligodendrocyte progenitor cells(45, 46), which minimally express vimentin.  
433 Interestingly, IDHwt cells had higher expression of ferritin light and heavy chains, indicating increased  
434 iron storage in these cells. Removal of free iron by enhanced iron storage has been implicating in  
435 evading ferroptosis by cancer cells. A more in-depth analysis to this pathway in this cell cluster is  
436 necessary to determine if evasion of ferroptosis is indeed driving the tumor growth in these patients.  
437 **Fig. 3** shows two representative examples of IDHwt and mt tumor samples, with biomarker staining and  
438 relative biomarker expression for clusters 2 and 6. Clustering of cells by expression of individual  
439 hallmarks (angiogenesis, invasion and reprogramming cellular energetics) also showed significant  
440 differences in cluster profiles and distribution of clusters among IDH mt and wt tumors (e.g. dominantly

441 higher representation of proangiogenic clusters in IDHwt tumors, **S8 Fig.**). Overall, similar staining  
442 profiles and biomarker patterns in IDHmt vs wt cases were found in the recurrent GBM cohort.

443 **Fig. 2. Distribution and clustering of cells based on protein expression from all**  
444 **treatment-naïve patients.** Unsupervised clustering of MxIF data revealed 7 distinct  
445 subsets (clusters) of cells derived from all patients. Cluster 2 is dominated by IDH1wt  
446 and Cluster 6 is dominated by IDH1mt cases. Clusters 1, 4 and 7 (which were less diverse  
447 patient groups) show higher staining intensities of most MxIF markers (cancer  
448 hallmarks) compared to Clusters 2, 5 and 6. Iron Metabolism hallmark was generally  
449 high in Cluster 2, but low in Cluster 6.

450  
451 **Fig. 3. IF images & Lolipop plots for Cell-DIVE cluster 2 and cluster 6 hallmarks.** MxIF  
452 images for representative cases in Cluster 2 (A) and Cluster 6 (D), including a vH&E  
453 image (top left), segmented image (top middle) showing individual cells, an image with  
454 cluster assignment to individual cells (top right) and a number of single marker or multi-  
455 marker overlays representing expression of different hallmark proteins (a: DNA breaks,  
456 gH2AX. b: Iron metabolism; FTL, FTH1; c: Cell Death, Cleaved Caspase3; d: Proliferation,  
457 EGFR, pERK, Ki67; e: Immune MHC1, PDL1; f: Stemness, Nestin, SOX2; g: Angiogenesis,  
458 VEGFR2, SMA, S100A4, CD31; h & i: Metabolism, FASN overlaid on DAPI (h) & GSK3b,  
459 PKM2, CA9 (i); j & k: Invasion, GFAP, Collagen IV (j) and Vimentin, Cofilin & NCad (k).  
460 Panel B and Panel E show the protein expression profiles of individual clusters (2 & 6,  
461 respectively); “lolipop” lines originate at the average expression of proteins in all cells  
462 measured from all cases and dots reside at the expression of the proteins in the cluster.  
463 Lines moving to the left show lower than average expression, while to the right show  
464 higher than average expression. Cluster 2 (Panel C) and cluster 6 (Panel F) trend towards

465 separating cases by IDH1 mutation status. Specifically, Cluster 6, which shows a lower  
466 than average expression of most hallmark proteins, is significantly positively correlated  
467 to IDH1 mutation (Panel F); Cluster 2 cells with higher iron metabolism (FTL, FTH1) show  
468 a trend towards lower representation in IDH1 mutant samples (Panel C). These positive  
469 and negative correlations are even stronger when cluster representation in individual  
470 cores is correlated to the overall patient status indicating that there is heterogeneity  
471 within these tumors.

472

### 473 **Cell cluster alignment with IDH and other glioma related mutations**

474 **Fig. 4** shows cluster distribution aligned with IDH mutation status and the other most common  
475 mutations in treatment-naïve glioma. In concordance with known biology, IDH1 mutations were found  
476 to be mutually exclusive of EGFR and PTEN mutations (**Fig. 4, panel B**). IDH1mt samples appeared to be  
477 more homogenous, particularly those with concurrent ATRX mutation, and were mostly dominated by  
478 the cluster 6 cell phenotype (lower than average expression of most markers (panel A). Approx. 50% of  
479 IDH1wt cases with EGFR amplification had a high proportion of cluster 2 cells (overall, average  
480 biomarker expression, and lower DNA damage and stem cell markers, higher iron metabolism markers).

481 **Fig. 4. Cell cluster composition and Oncoprint of treatment naïve gliomas.** For each  
482 glioma case, Panel A portrays the fractional distribution of its cells within each of the 7  
483 clusters. Panel B depicts the genomic profile of each glioma case.

484

### 485 **Cell cluster alignment with RNA expression and IDH status**

486 The degree to which single cell clusters agreed with deconvoluted, transcript-based cell class  
487 assignments across treatment-naïve gliomas with IDHmt or wt was also evaluated. Based on the gene

488 expression data of all measured genes, we identified three cell classes using CellDistinguisher, each class  
489 having 50 or more distinguisher genes (**S9 Fig.**). Exceeding three classes resulted in a very short list of  
490 distinguisher genes for some classes, which diminishes the utility of comparing behavior or functions  
491 across the classes. Classes 2 & 3 were qualitatively similar to protein derived cell clusters 6 and 2  
492 respectively. Ratios of the average staining intensities for 21 markers in clusters 6 and 2 were calculated  
493 (**Fig. 5A**). The ratios of the expression values for the same 21 genes were compared between RNA  
494 classes 2 and 3 (**Fig. 5B**). Fractional composition of IDHmt and wt cases within cell cluster 2 or 6 (**Fig. 5C**)  
495 or within RNA class 2 or 3 (**Fig. 5D**) was determined. Consistent with earlier results, tumors dominated  
496 by cluster 2 cells were more likely to be IDHwt, while cases with dominance of cluster 6 were mostly  
497 IDH1mt. Similarly, the IDHwt tumors were mainly comprised of RNA class 3 markers while class 2 was  
498 more abundant in the IDH1mt (**Fig. 5D**). IDH1wt tumors were enriched in class 3 cells (enriched in genes  
499 related to the cancer hallmarks of inducing angiogenesis, enabling replicative immortality and evading  
500 growth suppression), while the IDH1mt samples had a lower abundance of genes related to these cancer  
501 hallmarks.

502 **Fig. 5. IDH1 mutation status drives cell phenotype at both the gene and the protein**  
503 **level.** Ratios of the average staining intensities for 21 MxIF markers in clusters 6 and 2  
504 were calculated (Panel A). Following deconvolution of the transcriptomes using  
505 CellDistinguisher, RNA expression counts (FPKM) for the mRNAs were used to  
506 distinguish “class types” (n=3) across the bulk sequenced specimens, then ratios of the  
507 expression values for the same 21 genes compared between Class 2 and Class 3 (Panel  
508 B. Fractional composition of each patient case within Cluster 2 or 6 (Panel C) or within  
509 Class 2 or 3 (Panel D) was determined. Cases dominated by cells belonging to protein  
510 cluster 2 were more likely to be found in IDH1 wild-type tumors, while cases for which  
511 cells from cluster 6 dominated were mostly IDH1 mutated tumors (Panel C). Similarly,

512 the fractional composition of glioma cases comprised of gene expression class 3 were  
513 present in higher proportions in IDH1 wild type samples, while class 2 cell types were  
514 more abundant in the IDH1 mutant ones (Panel D). The distinguisher genes of class 3  
515 were enriched in genes related to cancer hallmarks of “inducing angiogenesis”,  
516 “enabling replicative immortality” and “evading growth suppression” (see S4 Fig. and S2  
517 Table).

518  
519 We have found noteworthy similarity between the cell types and patient compositions identified from  
520 the MxIF biomarker intensities and the gene expression data. Except for FASN, GSK3b and NCad, good  
521 directional correlation was observed in differential protein and gene expression between cell clusters  
522 and RNA classes in the IDH1mt and IDHwt populations (**Fig. 5**). Lack of concordance between H2AX  
523 protein and transcript likely is due to staining intensity by anti- $\gamma$ H2AX antibody reporting only the post-  
524 translationally phosphorylated form of the protein (instead of total protein, which the transcript count  
525 would more reasonable reflect). The high concordant directionality of 17 of the 21 markers argues for  
526 robustness of the biological inference that molecular features in cells from treatment-naïve gliomas are  
527 related to IDH1 mutation status. We conclude that biomarker-based clusters 6 and 2 refer to the same  
528 cells and/or processes as gene-expression-based classes 2 and 3. Although at individual gene levels,  
529 mRNA and protein expression values don’t evidence quantitative direct, strong correlation, our findings  
530 indicate that looking at the behavior of cells at the gene set or pathway level can lead to consistent  
531 patterns starting from different data types (47, 48).

532

### 533 **Intratumor and spatial heterogeneity**

534 In addition to the cell level protein expression and cell composition within the IDHmt and wt tumors, we  
535 further investigated molecular and spatial heterogeneity of the biomarkers in each of the hallmark



536 categories. Examples of the heterogeneity metrics for the cell proliferation hallmark (comprising Ki67,  
537 nestin and EGFR) in gliomas and recurrent GBMs are shown in **Fig. 6A**, which shows the discretized (high  
538 (2), medium (1), low (0)) expression values for each marker, and corresponding color-coding for each  
539 cell. Heterogeneity calculated from the distribution of these states in different tumors shows an inverse  
540 correlation between molecular and spatial heterogeneity in both treatment-naïve glioma and recurrent  
541 GBM cohorts. IDHwt tumors had higher molecular heterogeneity while IDHmt tumors were more  
542 spatially heterogenous (S10 Fig.). Similar trends were present in both cohorts. **Fig. 6B** shows a scatter  
543 plot of heterogeneity in the inducing angiogenesis hallmark with the range of spatial and molecular  
544 heterogeneity metrics for gliomas and recurrent GBM samples, also encoded by IDHmt (red) and wt  
545 (blue) status. Trends in heterogeneity of this hallmark were similar to those observed for the  
546 proliferation hallmarks as well as activating invasion motility hallmark (S10 Fig.). No other significant  
547 differences in heterogeneity were found.

548 **Fig. 6. Computed molecular and spatial heterogeneity metrics using the multi-omics**  
549 **heterogeneity analysis (MOHA) tool.** The method first converts the continuous marker  
550 intensity measures of each segmented cell into an ordinal value representing either a  
551 high, medium, or low state. Panel (a) presents an example for the Sustaining  
552 Proliferative Signaling cancer hallmark. This gene set is composed of three markers:  
553 EGFR, Ki67, Nestin. The state of each of these markers can either be high (2), medium  
554 (1), or low (0). Therefore, the three-marker gene set has 27 possible molecular states  
555 presented in the color-coded legend (far left). The scatter plot (center) presents the  
556 spatial and molecular heterogeneity of treatment naïve gliomas and recurrent GBM  
557 samples. Images of tissues from four treatment naïve gliomas (A-D) and four recurrent  
558 GBM (E-H) are presented with each segmented cell colored by their expressed  
559 molecular state. The spatial state distributions of these eight samples are presented

560 above the scatter plot. For the 4-gene set “inducing angiogenesis” (SMA [ACTA2],  
561 VEGFR2 [KDR], CD31 [PECAM1], and S100A4) hallmark, IDH1 mutation status  
562 discriminates those cases with relatively lower molecular heterogeneity and relatively  
563 higher spatial heterogeneity in grade III treatment-naïve glioma or recurrent  
564 glioblastoma (panel b).

565

566

## 567 **MR feature differences between IDH1 mutant and wildtype patients**

568 Simple features derived from the MR images uncovered differences in discernable elements of brain  
569 tumor dispersion from IDH1wt and IDH1mt patients. IDH1wt patients had larger enhancing cores  
570 (feature “Normalized enhancing core volume”), but less contrast uptake in the peri-tumoral edema  
571 regions (feature “Edema T1 post”). On the other hand, the IDH1mt patients lack a clearly defined  
572 enhancing core, but have increased contrast uptake on the T1 post contrast MRI protocol in the peri-  
573 tumoral edema region (**Fig. 7**). These trends were observed both in the treatment-naïve glioma as well  
574 as the recurrent GBM, and are not surprising since the IDH1mt are known to have less contrast  
575 enhancement than the IDH1wt (49).

576 **Fig. 7. MRI-derived features appear to differentiate patients that carry an IDH1**  
577 **mutation (IDH1mt) and those that are wild type (IDH1wt), regardless if subjects are**  
578 **treatment naïve or have recurring GBM.** T1w post contrast MRI for IDH1wt subjects  
579 (a,e), and IDH1mt (b,f). The white outlines show the extent of the tumor as delineated  
580 by the expert neuroradiologist (LW). (c,g) Across the two cohorts, a similar trend may be  
581 notice when comparing the mean T1 post-contrast intensity signal in the peri-tumoral  
582 edema region, suggesting an increase in enhancement in the IDH1mt in the peri-tumoral

583 edema region when compared to the IDH1wt (c and g). An opposite trend is observed  
584 when comparing the normalized enhancing core volume across IDH1wt and IDH1mt (d  
585 and h), indicating that subjects with IDH1 mutants have limited to no enhancement.  
586 None of these comparisons reach statistical significance after multiple comparison  
587 correction using false discovery rate.

588  
589 Other intensity and volumetric features were evaluated on clinically important MRI protocols, e.g. ADC  
590 or FLAIR, but they failed to show separation between IDH1 mutational status or a consistent trend  
591 across the two cohorts. Thus, our analysis focuses on the normalized enhancing core volume –  
592 measuring the enhancing core volume normalized to the entire tumor volume, and the T1w MRI post  
593 contrast uptake in the peritumoral edema region. Statistical significance was not achieved for any  
594 features after multiple comparison corrections likely due to the small number of patients in each cohort.

## 595 **Multimodal data association**

596 Unlike previous studies (27),(28-31) that focused on predicting IDH1 mutational status using MRI  
597 features, we assessed the correlations of MRI features with genomic and proteomic markers within the  
598 angiogenesis hallmark to characterize the differences between IDH1 mutational status. **S11 Fig.** shows  
599 that larger enhancing cores are associated with higher RNA expression levels in the Inducing  
600 Angiogenesis hallmark. A similar association is observed with the expression levels of protein markers,  
601 i.e. S100A4 that is known to promote angiogenesis and metastasis development (50) , and VGFR2 that  
602 plays a fundamental role in neovascularization (51). These found associations were consistent  
603 regardless of the type of tumor, treatment naïve glioma or recurrent GBM.

604 When investigating multimodal associations (**Fig. 8**), we can also observe a consistent trend across the  
605 two cohorts of patients. Not surprisingly, IDH1 mutations are found in lower grade tumors, younger  
606 patients and have better overall survival. As also shown in **Fig. 7** and **S11 Fig.**, IDH1mt tumors have  
607 smaller enhancing cores but more contrast uptake in the edema regions and show reduced expression  
608 levels of RNA and protein from the Inducing Angiogenesis hallmark (**Fig. 8**, highlighted box). Of the five  
609 angiogenesis hallmark cell clusters, cluster 4 (above average expression of VEGFR2, SMA and CD31) and  
610 cluster 5 (above average expression of VEGFR2 and S100A4), which are characterized by higher  
611 expression of angiogenesis markers, show low cell percentages in the subjects with IDH1 mutations. On  
612 the other, the IDH1wt tumors are molecularly more diverse and show more heterogeneous multi-modal  
613 variables, yet still a general trend of higher expression levels of RNA and protein markers involved in  
614 inducing angiogenesis and reduced overall survival. Clusters with average (cluster 3) and lower than  
615 average expression (clusters 1 & 2) were distributed among all patients, however, relative proportion of  
616 these compared to the other two clusters was much higher in the IDHmt patients. Age, grade and  
617 histology are confounding factors in the recurrent GBM progression cohort as IDH1mt tumors tend to  
618 occur at younger age and are generally low grade oligodendrogliomas, however, as the similar trends  
619 were apparent in the recurrent cohort, which are all grade IV GBMs, these observations probably reflect  
620 differences in biology between the IDH1mt and IDH1wt tumors.

621 **Fig. 8. Comprehensive rendering of multi-scale measurements in gliomas.** Multiscale  
622 modalities depicted include: 1) clinical information (red), 2) IDH1 Mutational status  
623 (blue), 3) MRI derived variables (green), 4) RNA expression level of genes involved in the  
624 Inducing Angiogenesis Hallmark (black), and 5) Multiplex Immunofluorescence  
625 Angiogenesis markers or Cell clusters (magenta). The data is binned in low, medium and  
626 high categories. Across the treatment-naïve gliomas (a) and the recurrent (post-  
627 treatment) glioblastoma\* (b) cohorts, it can be observed that subjects that carry the

628 IDH1 mutation have low angiogenesis according to RNA expression levels and  
629 expression of S100A4 and VEGFR. The subjects also have high fraction of cells in clusters  
630 1 and 2, and low fraction of cells in cluster 4 and 5 (**S8 Fig.**), cluster profiles of  
631 angiogenesis clusters). Moreover, MR Images for the same subjects have lower  
632 normalized enhancing cores volumes and measure higher intensities on T1 post  
633 contrast. \*Recurrent GBM (5 subjects are not shown since they were missing MxIF.)  
634

## 635 Discussion

636 We deployed a multiscale workflow that accommodates biomedical imaging (multi-parameter MR  
637 imaging) of glial tumors, *in situ* multiplex immunodetection of discrete biochemical functional states in  
638 tissue sections from tumors, and next generation sequencing of DNA and RNA from those same tumors.  
639 The data produced by each technology was post-processed to regions-of-interest and features (MRI),  
640 molecular state assignments of individual cells in tissue (based on gene sets and signaling pathways  
641 interrogated by specific antibodies), and molecular subtyping, pathway and hallmark mapping  
642 (determined by mutations and cellular deconvolution from bulk RNA sequencing). A coherent picture of  
643 enhanced angiogenesis in IDHwt tumors evident in non-invasive *in vivo* imaging features emerges from  
644 the data derived from multiple platforms (genomic, proteomic and imaging) and scales from individual  
645 proteins to cell clusters/states as well as bulk tumor. Results are consistent with known observations at  
646 the molecular (suppression of proangiogenic markers in IDHmt tumors) and imaging scales (no or low  
647 enhancement in IDHmt tumor), but now fill in the gaps on how the two are linked through the  
648 intermediate scales of cellular states and their spatial organization. Multiplexed immunofluorescence  
649 (MxIF) staining using 43 antibodies on individual tissue sections (duplicate punches in a tissue  
650 microarray) afforded insight into the clustering of single cell functional states from 20 treatment-naïve

651 gliomas (grades 2 – 4) into 7 clusters. Discreet patterns of protein abundance across 7 hallmark  
652 phenotypes and 2 biochemical signature events (iron metabolism and DNA damage) suggest that broad  
653 segregation of such functional states may be associated with IDH1 mutation status. Among the more  
654 robustly discriminating hallmarks between IDH1 wildtype from IDH1mutant gliomas is that of  
655 angiogenesis. The enhancement patterns, specifically how much of the tumor enhances (assessed by the  
656 “normalized enhancing core volume” feature) and the contrast uptake in the peri-tumoral edema region  
657 (Edema T1 post intensity), appear to be consistently correlated with the IDH1 mutational status, a trend  
658 that is conserved across the two independent cohorts we investigated. Our findings suggest that the  
659 IDH1wt tumors have a more consistent enhancing pattern with a clearly defined enhancing rim and little  
660 uptake elsewhere. On the other hand, the IDH1mt tumors have a diffuse appearance on MRI without a  
661 well-defined enhancing rim and with higher uptake in the edema region, on account of infiltrating cells.  
662 Previous studies have linked poor survival with the peritumoral edema volume (52) and tumor volume  
663 (27). Moreover, IDH1mt tumors are known to have less edema (49). From the richness of the molecular  
664 heterogeneity portrayed from MxIF scoring, comparing the functional states of adjacent cells (whether  
665 they are similar or dissimilar) affords a calculation of spatial heterogeneity across the different hallmark  
666 phenotypes. Here we find the unanticipated segregation of both treatment-naïve gliomas as well as  
667 recurrent glioblastoma based on IDH1 mutation status within hallmarks of “invasion motility”,  
668 “proliferative signaling”, and “angiogenesis”. The genomic profiling depicted what is already known  
669 about glial tumors, (the mutual exclusivity of IDH1 mutations with EGFR and PTEN mutations, the co-  
670 existence of ATRX mutations only within a subset of IDH1 low grade tumors, etc), but also revealed the  
671 heretofore unknown frequent, diminished molecular heterogeneity of IDH1mt low grade tumors.  
672 Removal of free iron by enhanced iron storage has been implicated in evading ferroptosis by cancer cells  
673 (34, 35). Cluster 2, which was highly represented in IDH1wt tumors showed an increased expression of  
674 iron storage markers (FTL and FTH1) and decreased expression of  $\gamma$ H2AX, a marker of DNA breaks (**S7**

675 **Fig.**). This is consistent with increased sequestration of iron, making it unavailable for oxidative DNA  
676 damage leading to evasion of ferroptosis. A more in-depth analysis of this pathway that includes iron  
677 transport, storage and utilization is necessary to determine if evasion of ferroptosis is indeed driving the  
678 tumor growth in these patients (53, 54). Inter- and intra- tumoral molecular heterogeneity is a well-  
679 recognized feature of GBM (6, 55, 56) and is believed to be the main reason behind treatment failure.  
680 Emergence of several single cell analysis platforms has fueled the investigations of intra-tumoral  
681 heterogeneity of glioma (17, 57-59) , including tumor-stromal cell interactions (60, 61) as well as  
682 interactions between the diverse tumor cell populations (62, 63). Importance of the intercellular  
683 interactions among heterogenous tumor cell population is highlighted by the observations of Inda et. al.  
684 (62) that EGFR<sup>mt</sup> cells that are far outnumbered by the EGFR<sup>wt</sup> population drive enhanced proliferation  
685 of these cells by paracrine signaling thereby driving tumor growth. Thus, tools to evaluate molecular  
686 and spatial heterogeneity and cell-cell interactions are likely to unravel heretofore unknown  
687 mechanisms that drive tumor growth and/or treatment failure. IDH mutation induced suppression of  
688 immune response has also been noted previously, however, it has been linked to decreased expression  
689 of effector T cell response related genes (64) . Whether this in turn affects the expression of HLA1 in  
690 IDH<sup>mt</sup> tumors is not known.

691

## 692 **Study limitations**

693 The key limitations of this study include small sample size, lack of registration of sample derived for  
694 molecular analysis to MR images and a limited number of markers representing different hallmarks. The  
695 intent of this study was not to generate a diagnostic signature but to evaluate correlation between  
696 imaging and molecular features at the hallmark level and to generate a work flow for integrating  
697 multiscale multiparametric data to study disease biology. While the sample size (n=20) in the

698 treatment-naïve glioma cohort was limited, the fact that similar cell clusters existed in another cohort  
699 (recurrent GBM) and the correlations between MR and molecular features of angiogenesis hallmark  
700 hold for both cohorts is encouraging. Having developed methods to integrate and evaluate such a  
701 complex data set, we are in the process of designing a more focused study to interrogate the biology of  
702 a specific molecular subtype of GBM that will consider and address the aforementioned shortcomings.

## 703 **Acknowledgements**

704 We acknowledge the significant support from Alex Corwin, Sireesha Kaanumalle and Christina Lowes for  
705 antibody validation testing.

706

## 707 **References**

- 708 1. Ostrom QT, Gittleman H, Truitt G, Boscia A, Kruchko C, Barnholtz-Sloan JS. CBTRUS Statistical  
709 Report: Primary Brain and Other Central Nervous System Tumors Diagnosed in the United States in  
710 2011-2015. *Neuro Oncol.* 2018;20(suppl\_4):iv1-iv86.
- 711 2. Brennan CW, Verhaak RG, McKenna A, Campos B, Nounshmehr H, Salama SR, et al. The somatic  
712 genomic landscape of glioblastoma. *Cell.* 2013;155(2):462-77.
- 713 3. Cancer Genome Atlas Research N, Brat DJ, Verhaak RG, Aldape KD, Yung WK, Salama SR, et al.  
714 Comprehensive, Integrative Genomic Analysis of Diffuse Lower-Grade Gliomas. *N Engl J Med.*  
715 2015;372(26):2481-98.
- 716 4. Ceccarelli M, Barthel FP, Malta TM, Sabedot TS, Salama SR, Murray BA, et al. Molecular Profiling  
717 Reveals Biologically Discrete Subsets and Pathways of Progression in Diffuse Glioma. *Cell.*  
718 2016;164(3):550-63.
- 719 5. Consortium G. Glioma through the looking GLASS: molecular evolution of diffuse gliomas and  
720 the Glioma Longitudinal Analysis Consortium. *Neuro Oncol.* 2018;20(7):873-84.



- 721 6. Cancer Genome Atlas Research N. Comprehensive genomic characterization defines human  
722 glioblastoma genes and core pathways. *Nature*. 2008;455(7216):1061-8.
- 723 7. Phillips HS, Kharbanda S, Chen R, Forrest WF, Soriano RH, Wu TD, et al. Molecular subclasses of  
724 high-grade glioma predict prognosis, delineate a pattern of disease progression, and resemble stages in  
725 neurogenesis. *Cancer Cell*. 2006;9(3):157-73.
- 726 8. Bhat KPL, Balasubramanian V, Vaillant B, Ezhilarasan R, Hummelink K, Hollingsworth F, et al.  
727 Mesenchymal differentiation mediated by NF-kappaB promotes radiation resistance in glioblastoma.  
728 *Cancer Cell*. 2013;24(3):331-46.
- 729 9. Hegi ME, Diserens AC, Godard S, Dietrich PY, Regli L, Ostermann S, et al. Clinical trial  
730 substantiates the predictive value of O-6-methylguanine-DNA methyltransferase promoter methylation  
731 in glioblastoma patients treated with temozolomide. *Clin Cancer Res*. 2004;10(6):1871-4.
- 732 10. Noushmehr H, Weisenberger DJ, Diefes K, Phillips HS, Pujara K, Berman BP, et al. Identification  
733 of a CpG island methylator phenotype that defines a distinct subgroup of glioma. *Cancer Cell*.  
734 2010;17(5):510-22.
- 735 11. Yan H, Parsons DW, Jin G, McLendon R, Rasheed BA, Yuan W, et al. IDH1 and IDH2 mutations in  
736 gliomas. *N Engl J Med*. 2009;360(8):765-73.
- 737 12. Cimino PJ, Zager M, McFerrin L, Wirsching HG, Bolouri H, Hentschel B, et al. Multidimensional  
738 scaling of diffuse gliomas: application to the 2016 World Health Organization classification system with  
739 prognostically relevant molecular subtype discovery. *Acta Neuropathol Commun*. 2017;5(1):39.
- 740 13. Louis DN, Perry A, Reifenberger G, von Deimling A, Figarella-Branger D, Cavenee WK, et al. The  
741 2016 World Health Organization Classification of Tumors of the Central Nervous System: a summary.  
742 *Acta Neuropathol*. 2016;131(6):803-20.
- 743 14. Aum DJ, Kim DH, Beaumont TL, Leuthardt EC, Dunn GP, Kim AH. Molecular and cellular  
744 heterogeneity: the hallmark of glioblastoma. *Neurosurg Focus*. 2014;37(6):E11.

- 745 15. Sottoriva A, Spiteri I, Piccirillo SG, Touloumis A, Collins VP, Marioni JC, et al. Intratumor  
746 heterogeneity in human glioblastoma reflects cancer evolutionary dynamics. *Proc Natl Acad Sci U S A*.  
747 2013;110(10):4009-14.
- 748 16. Kumar A, Boyle EA, Tokita M, Mikheev AM, Sanger MC, Girard E, et al. Deep sequencing of  
749 multiple regions of glial tumors reveals spatial heterogeneity for mutations in clinically relevant genes.  
750 *Genome Biol*. 2014;15(12):530.
- 751 17. Patel AP, Tirosh I, Trombetta JJ, Shalek AK, Gillespie SM, Wakimoto H, et al. Single-cell RNA-seq  
752 highlights intratumoral heterogeneity in primary glioblastoma. *Science*. 2014;344(6190):1396-401.
- 753 18. Furnari FB, Cloughesy TF, Cavenee WK, Mischel PS. Heterogeneity of epidermal growth factor  
754 receptor signalling networks in glioblastoma. *Nat Rev Cancer*. 2015;15(5):302-10.
- 755 19. Morokoff A, Ng W, Gogos A, Kaye AH. Molecular subtypes, stem cells and heterogeneity:  
756 Implications for personalised therapy in glioma. *J Clin Neurosci*. 2015;22(8):1219-26.
- 757 20. Ryu YJ, Choi SH, Park SJ, Yun TJ, Kim JH, Sohn CH. Glioma: application of whole-tumor texture  
758 analysis of diffusion-weighted imaging for the evaluation of tumor heterogeneity. *PLoS One*.  
759 2014;9(9):e108335.
- 760 21. Gerdes MJ, Sevinsky CJ, Sood A, Adak S, Bello MO, Bordwell A, et al. Highly multiplexed single-  
761 cell analysis of formalin-fixed, paraffin-embedded cancer tissue. *Proc Natl Acad Sci U S A*.  
762 2013;110(29):11982-7.
- 763 22. Kiefer J, Sara N, Graf JL, Kodira C, Ginty F, Newberg L, et al. Hallmarks of Cancer Gene Set  
764 Annotation2017.
- 765 23. Bai HX, Lee AM, Yang L, Zhang P, Davatzikos C, Maris JM, et al. Imaging genomics in cancer  
766 research: limitations and promises. *Br J Radiol*. 2016;89(1061):20151030.
- 767 24. Ellingson BM. Radiogenomics and imaging phenotypes in glioblastoma: novel observations and  
768 correlation with molecular characteristics. *Curr Neurol Neurosci Rep*. 2015;15(1):506.

- 769 25. Pinker K, Shitano F, Sala E, Do RK, Young RJ, Wibmer AG, et al. Background, current role, and  
770 potential applications of radiogenomics. *J Magn Reson Imaging*. 2018;47(3):604-20.
- 771 26. Sala E, Mema E, Himoto Y, Veeraraghavan H, Brenton JD, Snyder A, et al. Unravelling tumour  
772 heterogeneity using next-generation imaging: radiomics, radiogenomics, and habitat imaging. *Clin*  
773 *Radiol*. 2017;72(1):3-10.
- 774 27. Carrillo JA, Lai A, Nghiemphu PL, Kim HJ, Phillips HS, Kharbanda S, et al. Relationship between  
775 tumor enhancement, edema, IDH1 mutational status, MGMT promoter methylation, and survival in  
776 glioblastoma. *AJNR Am J Neuroradiol*. 2012;33(7):1349-55.
- 777 28. Park YW, Han K, Ahn SS, Bae S, Choi YS, Chang JH, et al. Prediction of IDH1-Mutation and  
778 1p/19q-Codeletion Status Using Preoperative MR Imaging Phenotypes in Lower Grade Gliomas. *AJNR*  
779 *Am J Neuroradiol*. 2018;39(1):37-42.
- 780 29. Su CQ, Lu SS, Zhou MD, Shen H, Shi HB, Hong XN. Combined texture analysis of diffusion-  
781 weighted imaging with conventional MRI for non-invasive assessment of IDH1 mutation in anaplastic  
782 gliomas. *Clin Radiol*. 2018.
- 783 30. Li ZC, Bai H, Sun Q, Zhao Y, Lv Y, Zhou J, et al. Multiregional radiomics profiling from  
784 multiparametric MRI: Identifying an imaging predictor of IDH1 mutation status in glioblastoma. *Cancer*  
785 *Med*. 2018;7(12):5999-6009.
- 786 31. Chang K, Bai HX, Zhou H, Su C, Bi WL, Agbodza E, et al. Residual Convolutional Neural Network  
787 for the Determination of IDH Status in Low- and High-Grade Gliomas from MR Imaging. *Clin Cancer Res*.  
788 2018;24(5):1073-81.
- 789 32. Kickingereder P, Sahm F, Radbruch A, Wick W, Heiland S, Deimling A, et al. IDH mutation status  
790 is associated with a distinct hypoxia/angiogenesis transcriptome signature which is non-invasively  
791 predictable with rCBV imaging in human glioma. *Sci Rep*. 2015;5:16238.

- 792 33. Byron SA, Tran NL, Halperin RF, Phillips JJ, Kuhn JG, de Groot JF, et al. Prospective Feasibility Trial  
793 for Genomics-Informed Treatment in Recurrent and Progressive Glioblastoma. *Clin Cancer Res.*  
794 2018;24(2):295-305.
- 795 34. Hangauer MJ, Viswanathan VS, Ryan MJ, Bole D, Eaton JK, Matov A, et al. Drug-tolerant persister  
796 cancer cells are vulnerable to GPX4 inhibition. *Nature.* 2017;551(7679):247-50.
- 797 35. Viswanathan VS, Ryan MJ, Dhruv HD, Gill S, Eichhoff OM, Seashore-Ludlow B, et al. Dependency  
798 of a therapy-resistant state of cancer cells on a lipid peroxidase pathway. *Nature.* 2017;547(7664):453-7.
- 799 36. Xie Y, Hou W, Song X, Yu Y, Huang J, Sun X, et al. Ferroptosis: process and function. *Cell Death*  
800 *Differ.* 2016;23(3):369-79.
- 801 37. Padfield D, Rittscher J, Roysam B. Coupled minimum-cost flow cell tracking for high-throughput  
802 quantitative analysis. *Med Image Anal.* 2011;15(4):650-68.
- 803 38. Halperin RF, Carpten JD, Manojlovic Z, Aldrich J, Keats J, Byron S, et al. A method to reduce  
804 ancestry related germline false positives in tumor only somatic variant calling. *BMC Med Genomics.*  
805 2017;10(1):61.
- 806 39. Aran D, Butte AJ. Digitally deconvolving the tumor microenvironment. *Genome Biol.*  
807 2016;17(1):175.
- 808 40. Teschendorff AE, Breeze CE, Zheng SC, Beck S. A comparison of reference-based algorithms for  
809 correcting cell-type heterogeneity in Epigenome-Wide Association Studies. *BMC Bioinformatics.*  
810 2017;18(1):105.
- 811 41. Newberg LA, Chen X, Kodira CD, Zavodszky MI. Computational de novo discovery of  
812 distinguishing genes for biological processes and cell types in complex tissues. *PLoS One.*  
813 2018;13(3):e0193067.
- 814 42. Gaujoux R, Seoighe C. CellMix: a comprehensive toolbox for gene expression deconvolution.  
815 *Bioinformatics.* 2013;29(17):2211-2.

- 816 43. Graf JF, Zavodszky MI. Characterizing the heterogeneity of tumor tissues from spatially resolved  
817 molecular measures. *PLoS One*. 2017;12(11):e0188878.
- 818 44. Menze BH, Jakab A, Bauer S, Kalpathy-Cramer J, Farahani K, Kirby J, et al. The Multimodal Brain  
819 Tumor Image Segmentation Benchmark (BRATS). *IEEE Trans Med Imaging*. 2015;34(10):1993-2024.
- 820 45. Alcantara Llaguno SR, Wang Z, Sun D, Chen J, Xu J, Kim E, et al. Adult Lineage-Restricted CNS  
821 Progenitors Specify Distinct Glioblastoma Subtypes. *Cancer Cell*. 2015;28(4):429-40.
- 822 46. Alcantara Llaguno SR, Xie X, Parada LF. Cell of Origin and Cancer Stem Cells in Tumor Suppressor  
823 Mouse Models of Glioblastoma. *Cold Spring Harb Symp Quant Biol*. 2016;81:31-6.
- 824 47. Akan P, Alexeyenko A, Costea PI, Hedberg L, Solnestam BW, Lundin S, et al. Comprehensive  
825 analysis of the genome transcriptome and proteome landscapes of three tumor cell lines. *Genome Med*.  
826 2012;4(11):86.
- 827 48. Maier T, Guell M, Serrano L. Correlation of mRNA and protein in complex biological samples.  
828 *FEBS Lett*. 2009;583(24):3966-73.
- 829 49. Wasserman JK, Nicholas G, Yaworski R, Wasserman AM, Woulfe JM, Jansen GH, et al.  
830 Radiological and pathological features associated with IDH1-R132H mutation status and early mortality  
831 in newly diagnosed anaplastic astrocytic tumours. *PLoS One*. 2015;10(4):e0123890.
- 832 50. Semov A, Moreno MJ, Onichtchenko A, Abulrob A, Ball M, Ekiel I, et al. Metastasis-associated  
833 protein S100A4 induces angiogenesis through interaction with Annexin II and accelerated plasmin  
834 formation. *J Biol Chem*. 2005;280(21):20833-41.
- 835 51. Basagiannis D, Zografou S, Murphy C, Fotsis T, Morbidelli L, Ziche M, et al. VEGF induces  
836 signalling and angiogenesis by directing VEGFR2 internalisation through macropinocytosis. *J Cell Sci*.  
837 2016;129(21):4091-104.
- 838 52. Wu CX, Lin GS, Lin ZX, Zhang JD, Liu SY, Zhou CF. Peritumoral edema shown by MRI predicts poor  
839 clinical outcome in glioblastoma. *World J Surg Oncol*. 2015;13:97.

- 840 53. Tong L, Yi L, Liu P, Abeysekera IR, Hai L, Li T, et al. Tumour cell dormancy as a contributor to the  
841 reduced survival of GBM patients who received standard therapy. *Oncol Rep.* 2018;40(1):463-71.
- 842 54. Wu T, Li Y, Liu B, Zhang S, Wu L, Zhu X, et al. Expression of Ferritin Light Chain (FTL) Is Elevated in  
843 Glioblastoma, and FTL Silencing Inhibits Glioblastoma Cell Proliferation via the GADD45/JNK Pathway.  
844 *PLoS One.* 2016;11(2):e0149361.
- 845 55. Friedmann-Morvinski D. Glioblastoma heterogeneity and cancer cell plasticity. *Crit Rev Oncog.*  
846 2014;19(5):327-36.
- 847 56. Meyer M, Reimand J, Lan X, Head R, Zhu X, Kushida M, et al. Single cell-derived clonal analysis of  
848 human glioblastoma links functional and genomic heterogeneity. *Proc Natl Acad Sci U S A.*  
849 2015;112(3):851-6.
- 850 57. Chen KH, Boettiger AN, Moffitt JR, Wang S, Zhuang X. RNA imaging. Spatially resolved, highly  
851 multiplexed RNA profiling in single cells. *Science.* 2015;348(6233):aaa6090.
- 852 58. Shah S, Lubeck E, Zhou W, Cai L. In Situ Transcription Profiling of Single Cells Reveals Spatial  
853 Organization of Cells in the Mouse Hippocampus. *Neuron.* 2016;92(2):342-57.
- 854 59. Stahl PL, Salmen F, Vickovic S, Lundmark A, Navarro JF, Magnusson J, et al. Visualization and  
855 analysis of gene expression in tissue sections by spatial transcriptomics. *Science.* 2016;353(6294):78-82.
- 856 60. Chen Z, Hambardzumyan D. Immune Microenvironment in Glioblastoma Subtypes. *Front*  
857 *Immunol.* 2018;9:1004.
- 858 61. Dey MF, H.; Heimberger, A.B. The Role of Glioma Microenvironment in Immune Modulation:  
859 Potential Targets for Intervention. *Letters in Drug Design & Discovery.* 2006;3(7):11.
- 860 62. Inda MM, Bonavia R, Mukasa A, Narita Y, Sah DW, Vandenberg S, et al. Tumor heterogeneity is  
861 an active process maintained by a mutant EGFR-induced cytokine circuit in glioblastoma. *Genes Dev.*  
862 2010;24(16):1731-45.

- 863 63. Inda MM, Bonavia R, Seoane J. Glioblastoma multiforme: a look inside its heterogeneous nature.  
864 Cancers (Basel). 2014;6(1):226-39.
- 865 64. Kohanbash G, Carrera DA, Shrivastav S, Ahn BJ, Jahan N, Mazor T, et al. Isocitrate  
866 dehydrogenase mutations suppress STAT1 and CD8+ T cell accumulation in gliomas. J Clin Invest.  
867 2017;127(4):1425-37.

## 868 **Supporting Information**

869

870 **S1 Table. Detailed patient characteristics and datasets for treatment naïve glioma cohort**

871

872 **S2 Table. Detailed patient characteristics and datasets for recurrent GBM cohort**

873

874 **S3 Table: Antibody information and staining sequence**

875

876 **S4 Table: Min and max number of cells per core in glioma and recurrent GBM TMAs**

877

878 **S1 Fig. Multiplexed immunofluorescence (MxIF) workflow**

879 The Cell DIVE MxIF workflow involves repeated cycles of staining, imaging and signal inactivation (panel

880 A), following slide clearing and antigen retrieval. Prior to antibody staining, tissue is stained with DAPI

881 and imaged in all channels of interest to record background autofluorescence (AF) of the tissue.

882 Following background imaging, tissue is stained with 2-3 antibodies and reimaged to capture antigen-

883 specific signal and then undergoes a dye inactivation step to remove the signal. The slide is re-imaged to

884 measure background fluorescence intensity. These cycles are repeated multiple times until all targets of

885 interest have been imaged. Panel 2 shows various image processing steps prior to generating single cell

886 data. Some of these are performed during imaging itself while others are performed post image  
887 acquisition. The steps include, illumination correction, to correct for uneven illumination across the  
888 FOV, registration of images from all rounds (using DAPI signal from each round) and tissue AF removal.  
889 Panel C: Staining intensity of various cellular and subcellular markers is used to generate cellular  
890 segmentation masks. Segmented images are compared with real or virtual H&Es (generated from DAPI  
891 stained background images at the beginning of multiplexing) by a trained biologist or pathologist, and  
892 images with poor segmentation are removed from analysis. In parallel, marker staining is evaluated by  
893 reviewing AF removed images and markers that failed to stain or images with large artefacts are  
894 removed from analysis. Marker expression is quantified at cellular and subcellular compartments and  
895 data is generated in an easy to use .csv or Excel format which is then analyzed by a variety of different  
896 tools/approaches including simple statistical correlations, cluster analysis as well as heterogeneity  
897 analysis.

898

## 899 **S2 Fig. Antibody validation workflow**

900 A typical antibody validation workflow: Starting with literature reports to identify antibody clones  
901 previously used for IHC on FFPE tissue, 3 or more clones per target are identified and evaluated for  
902 sensitivity and specificity of the signal on a multi-tissue array (TMA) comprising all major tumor types  
903 and corresponding normal tissues. The down-selected antibody is conjugated with CY3, Cy5 or Cy7 at 2  
904 different dye/protein ratio and conjugates validated by staining comparison with unconjugated primary  
905 on serial sections of the same TMA. The down-selected conjugate is tested at different concentrations  
906 on a TMA with tumor tissue of interest to determine the optimal concentration for staining. In parallel,  
907 a set of TMA serial sections are pre-treated with different rounds of bleaching and evaluated for  
908 bleaching solution's effect on antigen of interest by comparing the staining among this set. Antigens



909 with discernible effects are prioritized for staining early in the sequence, immediately after primary  
910 secondary staining of targets which failed to conjugate.

911

### 912 **S3 Fig. Marker Staining quality assessment**

913 A: Marker staining performance in each cohort (True-positive, False-negative), staining round,  
914 subcellular location used for analysis and gene symbol, B: examples of quantitative FOV level correlation  
915 of marker intensities on replicate slides, C: Examples of fluorescence image overlays of various hallmark  
916 markers showing heterogeneity of expression in astrocytoma.

917

### 918 **S4 Fig. Number of segmented cells in serial sections**

919 High correlation in number of segmented cells was observed between serial sections, particularly for the  
920 treatment naïve glioma cohort and two out of three sections of the recurrent GBM cohort.

921

### 922 **S5 Fig. Example workflow for calculating cell molecular state and cell spatial heterogeneity**

923 Example of how molecular state and cell spatial heterogeneity metrics are calculated, using EGFR as an  
924 example. A. Segmentation of cells using DAPI staining and generation of nuclear and extra-nuclear  
925 masks; B. EGFR fluorescence intensity is quantified for each cell and discretized as low, moderate, and  
926 high. The different levels of cell expression are shown as red (high), green (moderate) or blue (low). C.  
927 For each cell (I through v in this cartoon), adjacent neighboring (touching) cells are counted, and their  
928 Spatial State is used to sum the Spatial Heterogeneity.

929

930 **S6 Fig. Uni- (A) and multi-variate (B) analysis of biomarker expression and overall survival as a**  
931 **function of IDH mutation status**

932 A. Differences in individual biomarker expression and survival of IDHmt and IDHwt patients. B. A  
933 predictive multivariate model of IDH mutation status.

934

935 **S7 Fig. Lollipop plots for biomarker expression in each cluster, relative to population median**

936 Protein expression profiles of individual clusters plotted relative to median expression in the whole  
937 population. Solid circles represent the average expression in the cluster while direction and length of the  
938 lollipop shows difference in expression relative to population median (left-lower, right-higher).

939

940 **S8 Fig. Cell clusters based on angiogenesis hallmark proteins**

941 Unsupervised clustering of cells using angiogenesis hallmark proteins identified a 5 cluster set. Clusters  
942 with lower than average hallmark protein expression (1 & 2 ) are highly represented in samples with  
943 IDH1 mutation. Cluster 4 & 5 with higher expression are proportionally more abundant in IDH1wt  
944 samples.

945

946 **S9 Fig. Abundance of distinguisher genes (mRNA)/class per patient**

947 A: Relative proportion of cells belonging to different CellDistinguisher classes in each sample. Class 3 is  
948 highly represented in IDHwt samples. B: shows relative abundance of distinguisher genes grouped by  
949 hallmarks in individual classes.

950

951 **S10 Fig. Molecular and spatial heterogeneity in grade III gliomas and recurrent GBM IDHwt and IDHmt**  
952 **tumors**

953 Molecular and spatial heterogeneity in grade III gliomas and recurrent GBM IDHwt and IDHmt tumors  
954 according to the following hallmarks: Invasion and Motility, Cell Proliferative Signaling and Inducing  
955 Angiogenesis.

956

957 **S11 Fig. Differences in MR features across the population range of RNA and protein marker**

958 **expression for angiogenesis**

959 Correlation between Normalized enhancing core volume (derived from MRI) and Angiogenesis

960 estimated from (a,d) RNA expression levels, and, based on multiplex immunofluorescence (MxIF)

961 angiogenesis markers (b, e) S100A4 and (c,f) VEGFR2; (a-c) shows the plots on Cohort 1 (CW Glioma,

962 treatment naive) while (d-f) show cohort 2 (UCSF, recurrent GBM). A progressive increasing trend may

963 be observed in both cohorts when examining the normalized enhancing core volume for low, medium

964 and high angiogenesis. The trends across the enhancement ratio are also conserved when comparing

965 RNA with MxIF Angiogenesis. None of these comparisons reach statistical significance after multiple

966 comparison correction using false discovery rate.

967

Figure 7: MRI-derived features T1 edema and enhancement in IDH1wt and IDH1mt tumors

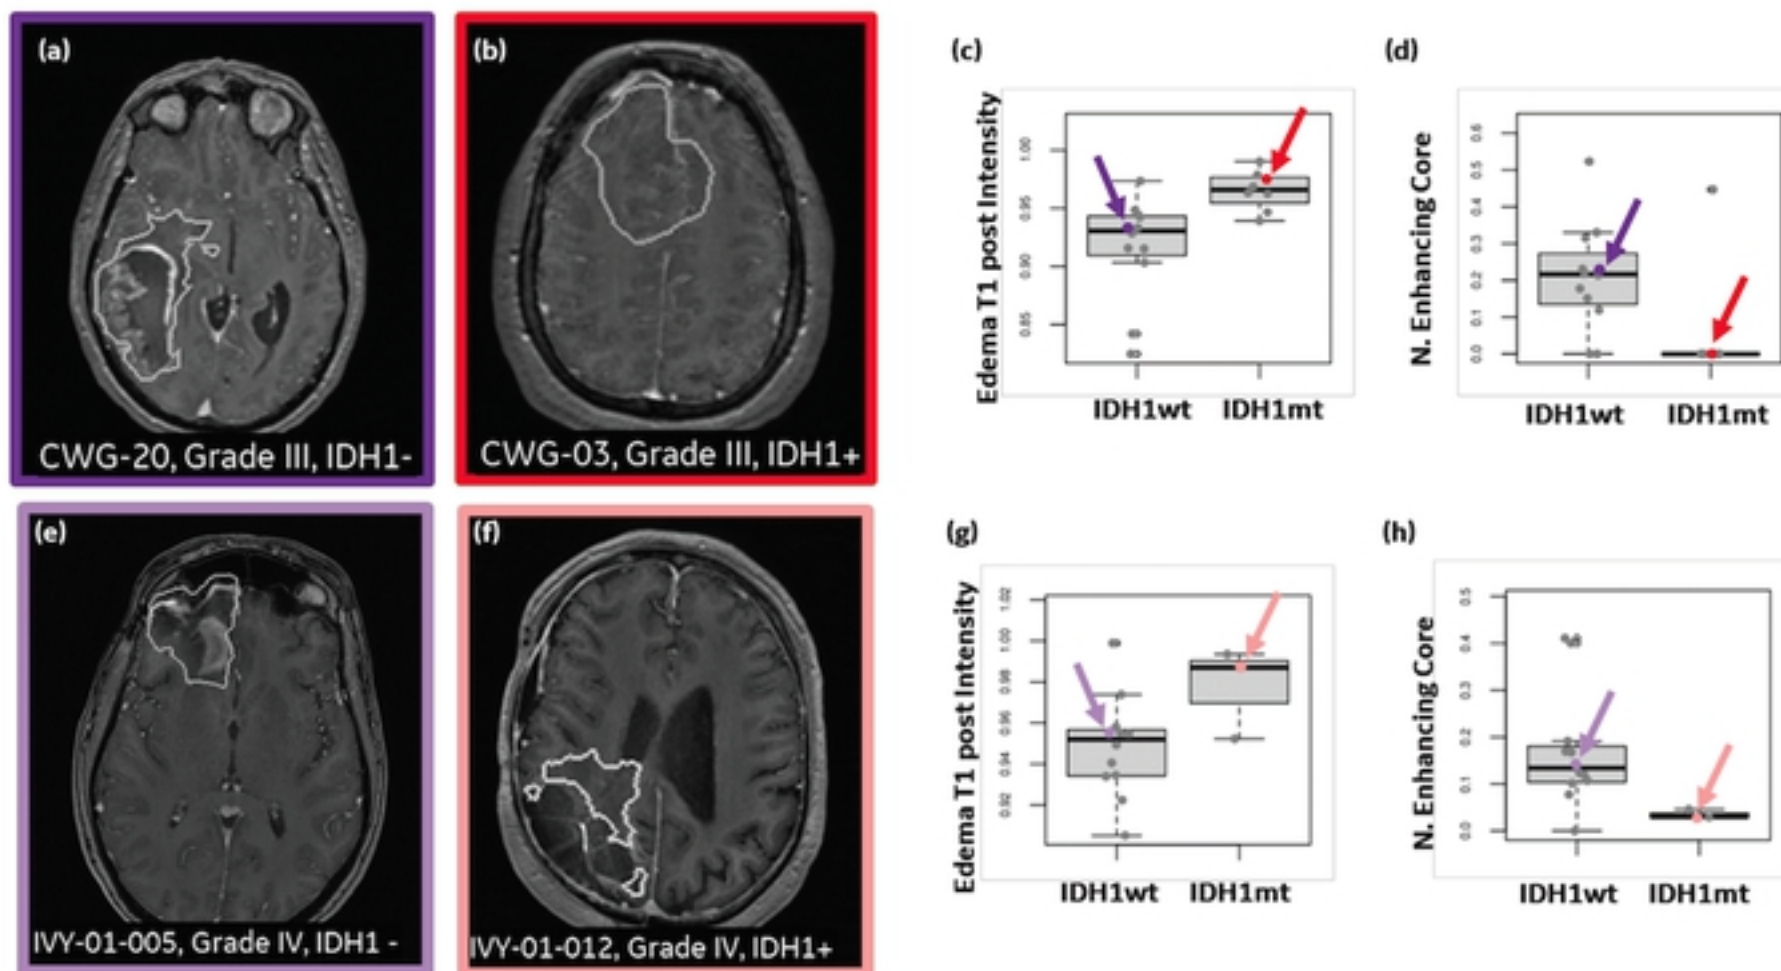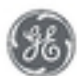

Figure 7

## Paper Figures:

**Table 1:** Patient characteristics summary

**Figure 1:** Multimodal data workflow

**Figure 2:** Distribution and clustering of cells based on protein expression from all treatment-naïve patients.

**Figure 3:** Cluster 2 and 6 profiles and example images for selected biomarkers in IDHwt and IDHmt tumors

**Figure 4:** Cell cluster composition and oncoprint of treatment naive gliomas

**Figure 5:** Correlation between IDH1 mutation status and cell phenotype at both gene and protein level.

**Figure 6:** Computed molecular and spatial heterogeneity metrics using the multi-omics heterogeneity analysis (MOHA) tool

**Figure 7:** MRI-derived features T1 edema and enhancement in IDH1wt and IDHmt tumors

**Figure 8:** Multiscale modality integration including IDH1 mutation, clinical data, survival, RNA expression (angiogenesis markers), protein expression and cell clusters

**Table 1: Patient Characteristics**

| Cohort                                  | Treatment naïve primary glioma patients | Recurrent/Refractory GBM patients |
|-----------------------------------------|-----------------------------------------|-----------------------------------|
| Patient number                          | 20                                      | 16                                |
| Median (range) age at diagnosis (years) | 57 (26-77)                              | 51 (29-66)                        |
| Gender                                  |                                         |                                   |
| Male                                    | 12                                      | 12                                |
| Female                                  | 8                                       | 4                                 |
| Ethnicity                               |                                         |                                   |
| Caucasian                               | 18                                      | 15                                |
| Hispanic, Asian, African American       | 0, 1, 1                                 | 1, 0, 0                           |
| Histologic Grade                        |                                         |                                   |
| II                                      | 5                                       | -                                 |
| III                                     | 7                                       | -                                 |
| IV                                      | 8                                       | 16                                |
| IDH1/2 Mutation status                  |                                         |                                   |
| Mutant (IDH1 R132H)                     | 8                                       | 3                                 |
| Wildtype                                | 12                                      | 13                                |
| 1p19q codeletion                        |                                         |                                   |
| Codeletion                              | 4                                       | -                                 |
| Non-codeletion                          | 16                                      | -                                 |
| Median (range) Survival (days)          |                                         |                                   |
| Grade II                                | 1120 (420-2326)                         |                                   |
| Grade III                               | 487 (370-2964)                          |                                   |
| Grade IV (GBM)                          | 438 (222-541)                           | 1031 (396-3771)                   |

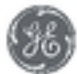

Figure 6: Computed molecular and spatial heterogeneity metrics using the multi-omics heterogeneity analysis (MOHA) tool

(a) Heterogeneity of cell proliferative markers

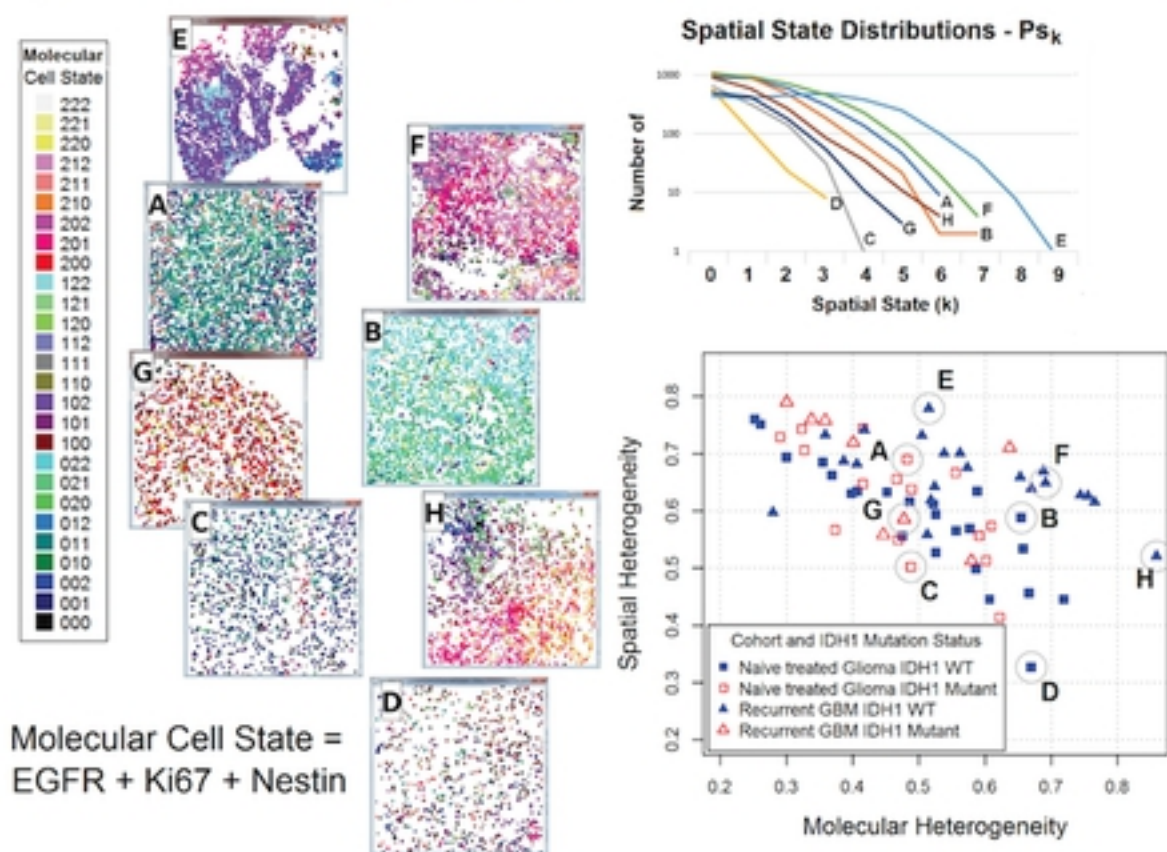

(b) Heterogeneity of inducing angiogenesis

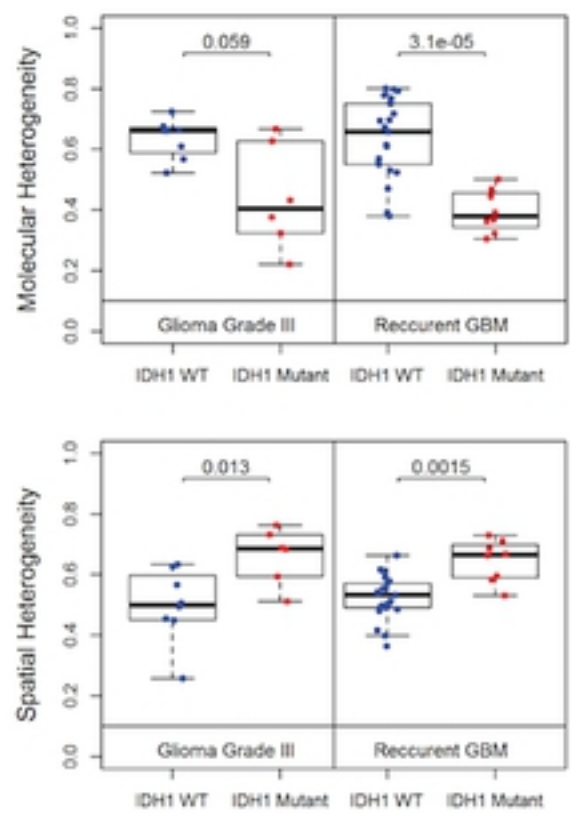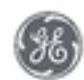

Figure 6



Figure 1: Overall workflow for generating multi-scale, multiparametric data, extraction of features and/or conversion to higher scales and analysis approaches

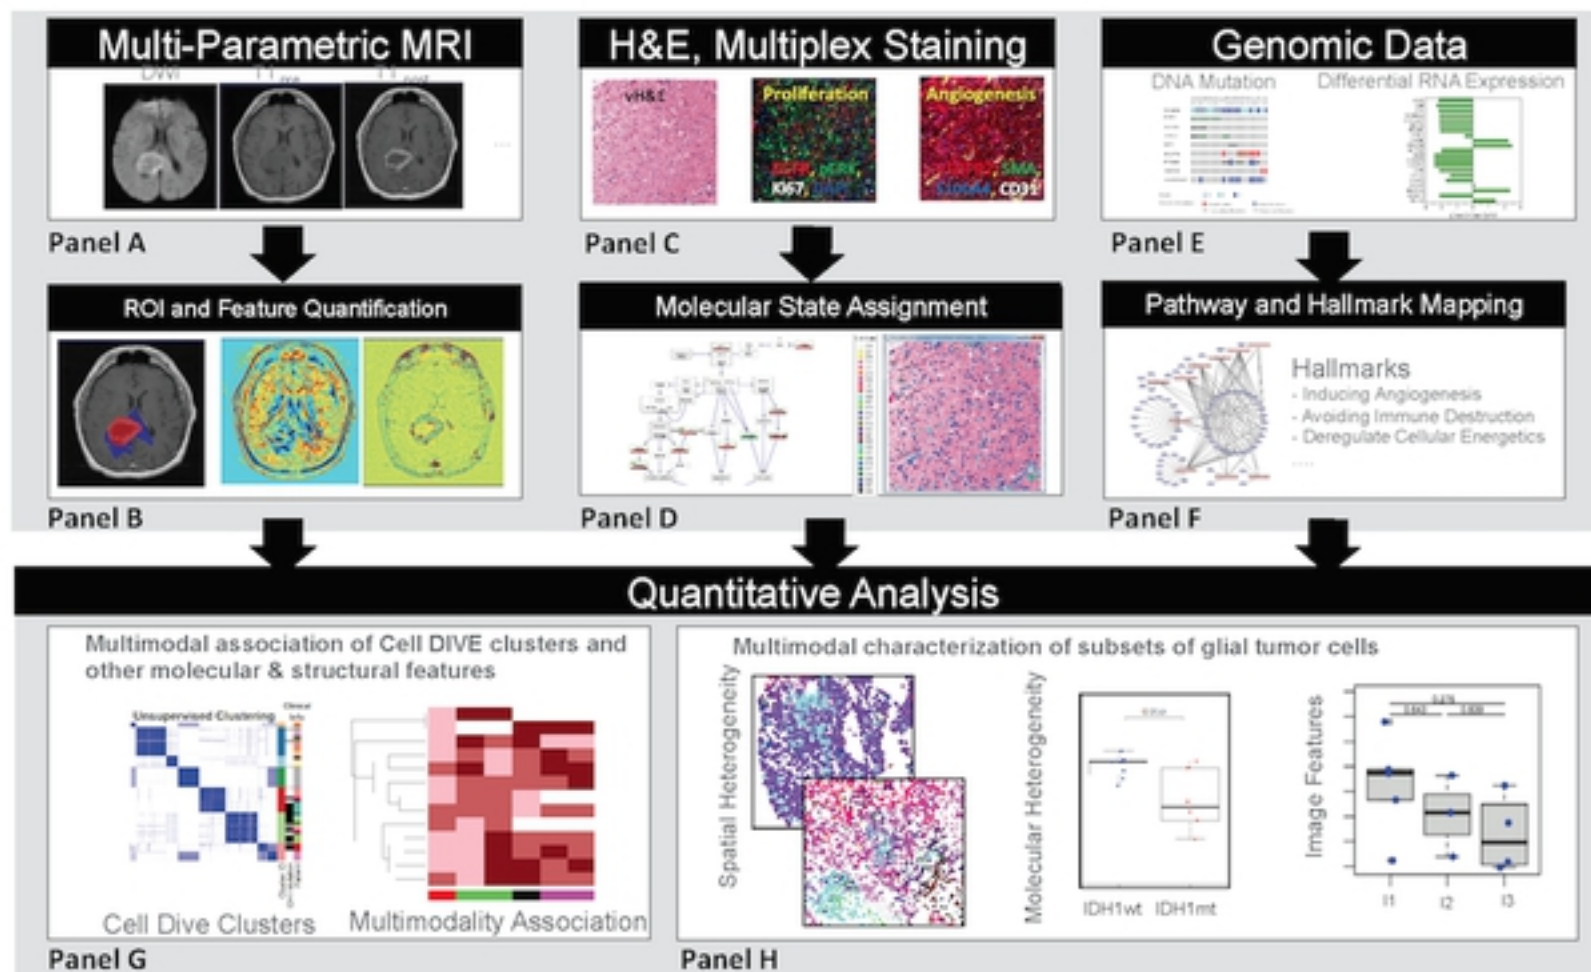



Figure 3: Cluster 2 and 6 profiles and example images for selected biomarkers in IDHwt and IDHmt tumors

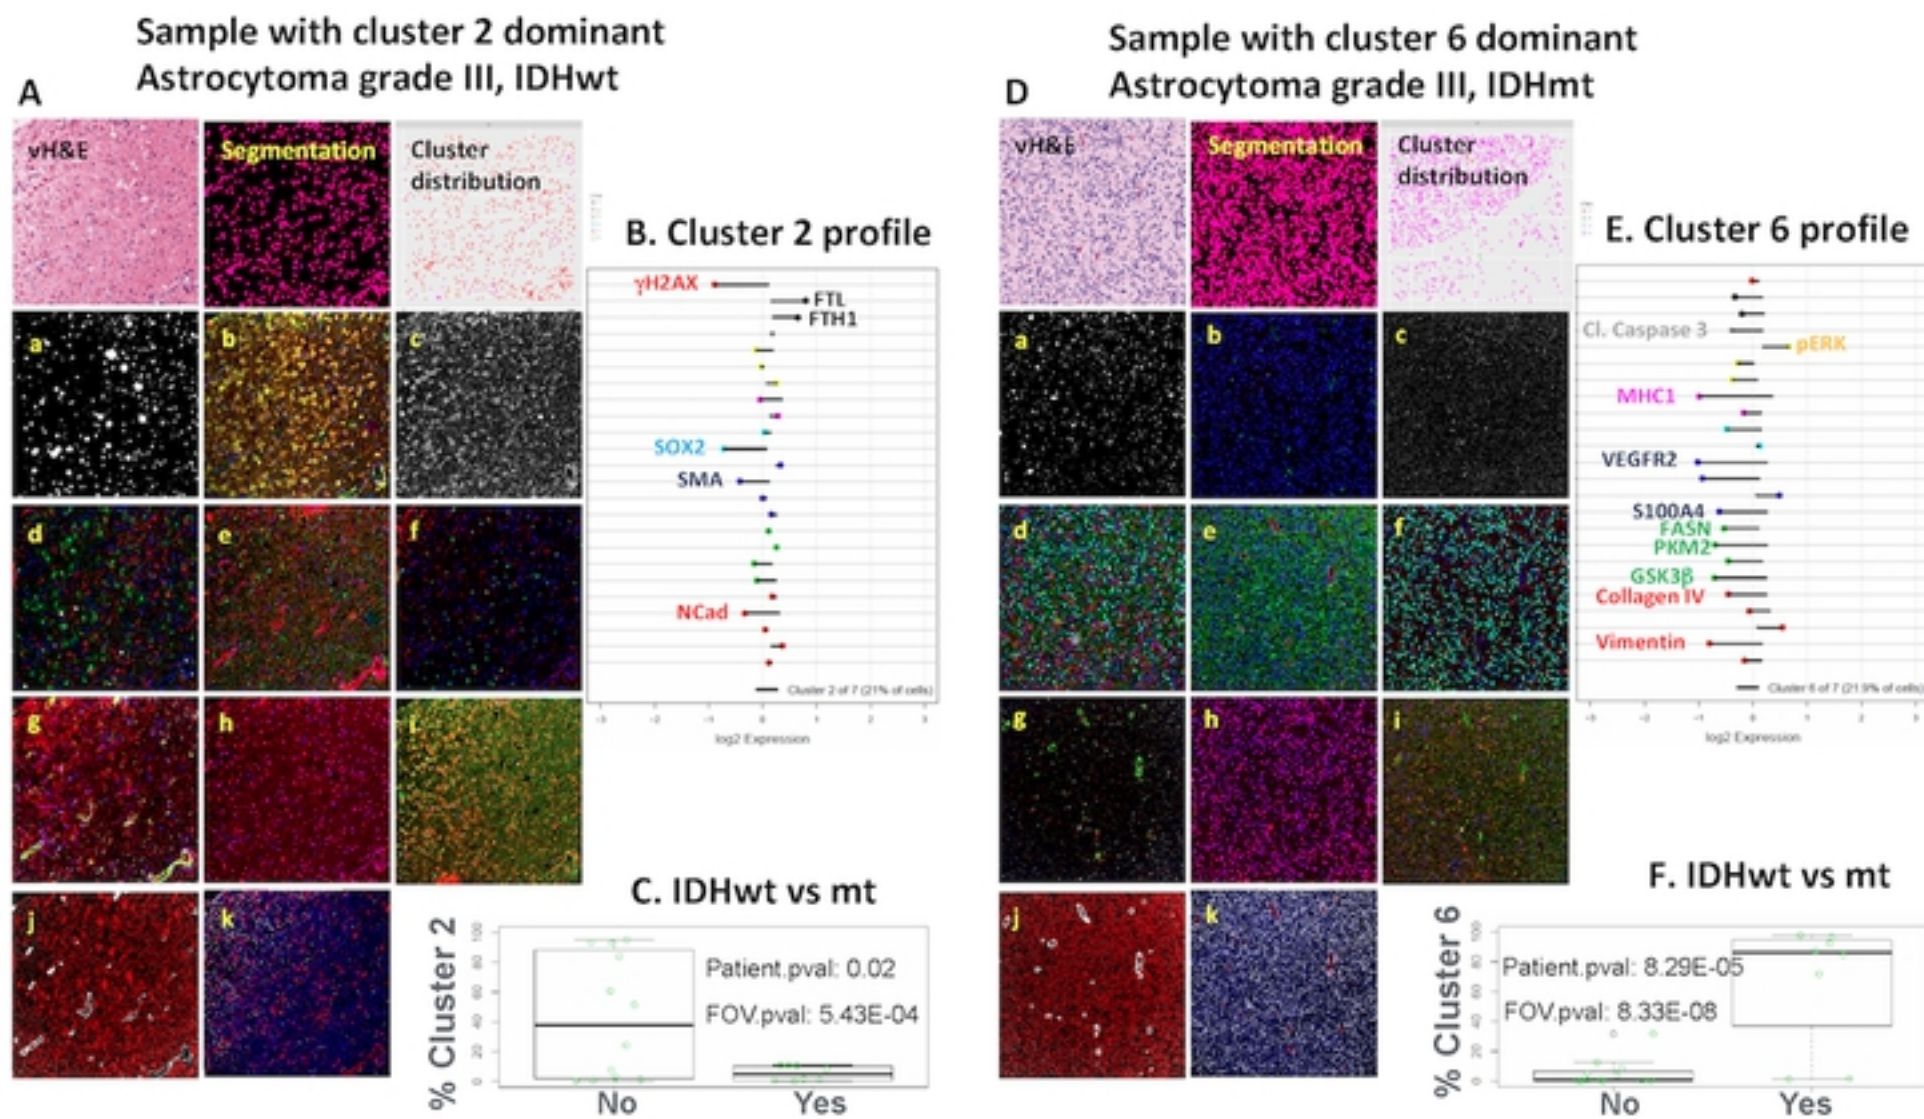

Figure 3

Figure 2: Distribution and clustering of cells based on protein expression in treatment naïve glioma patients

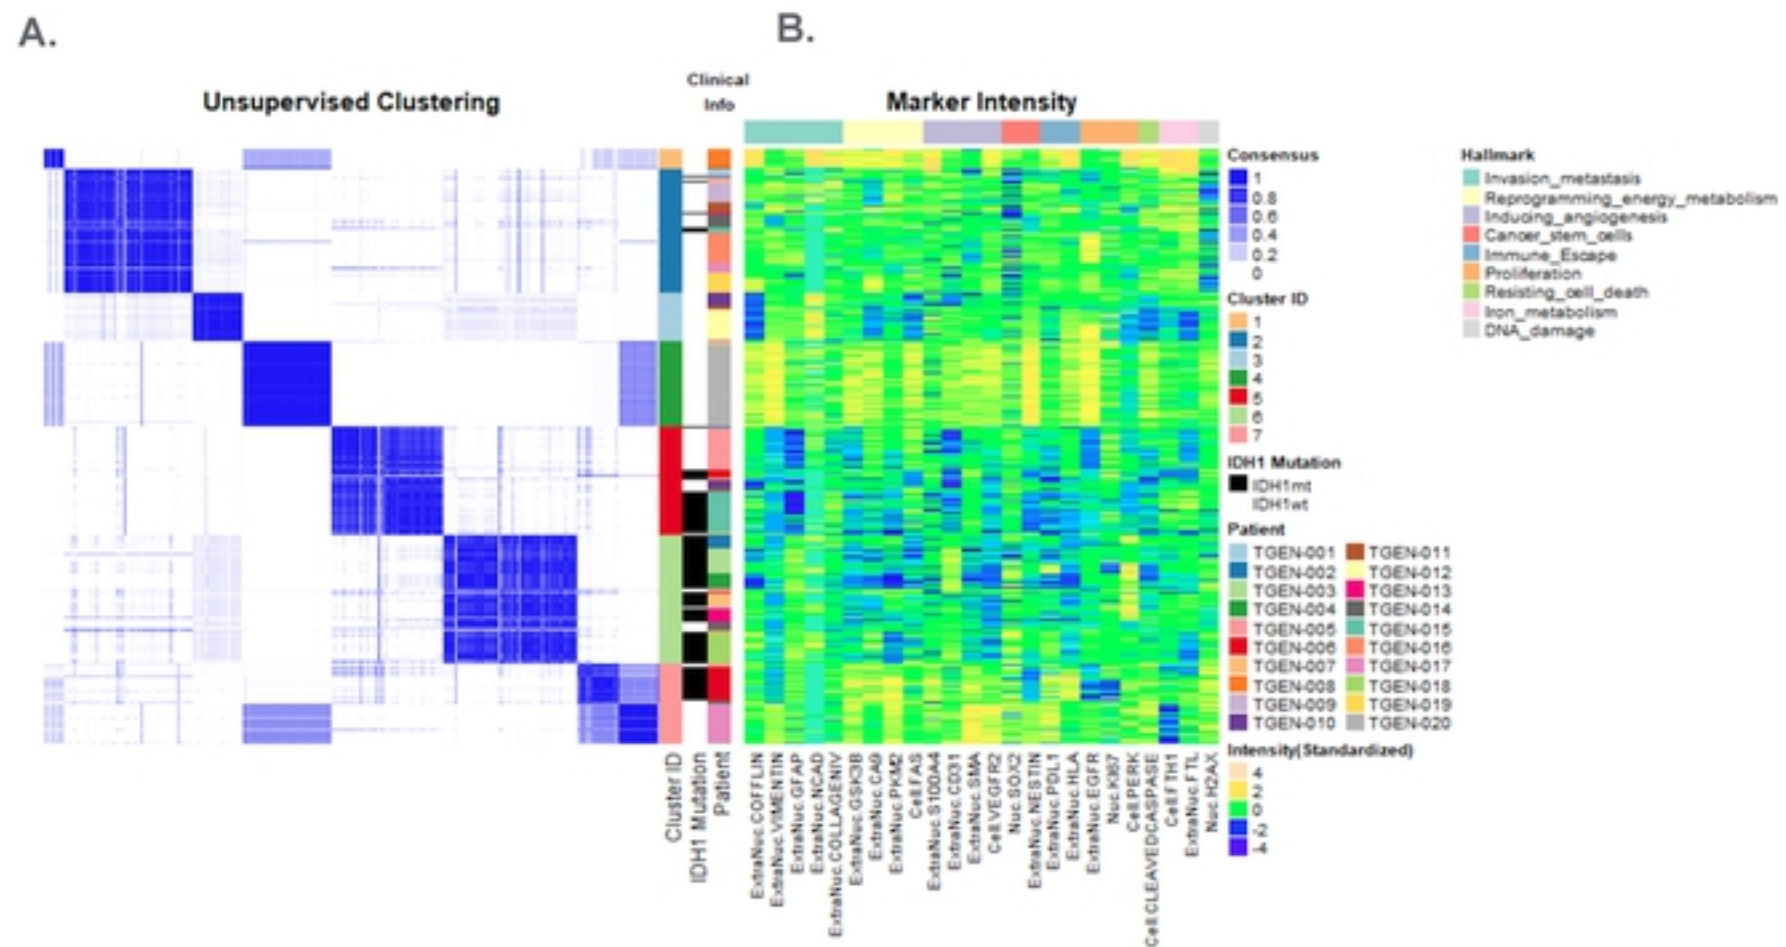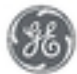

Figure 5: Correlation between IDH1 mutation status and cell phenotype at both gene and protein level.

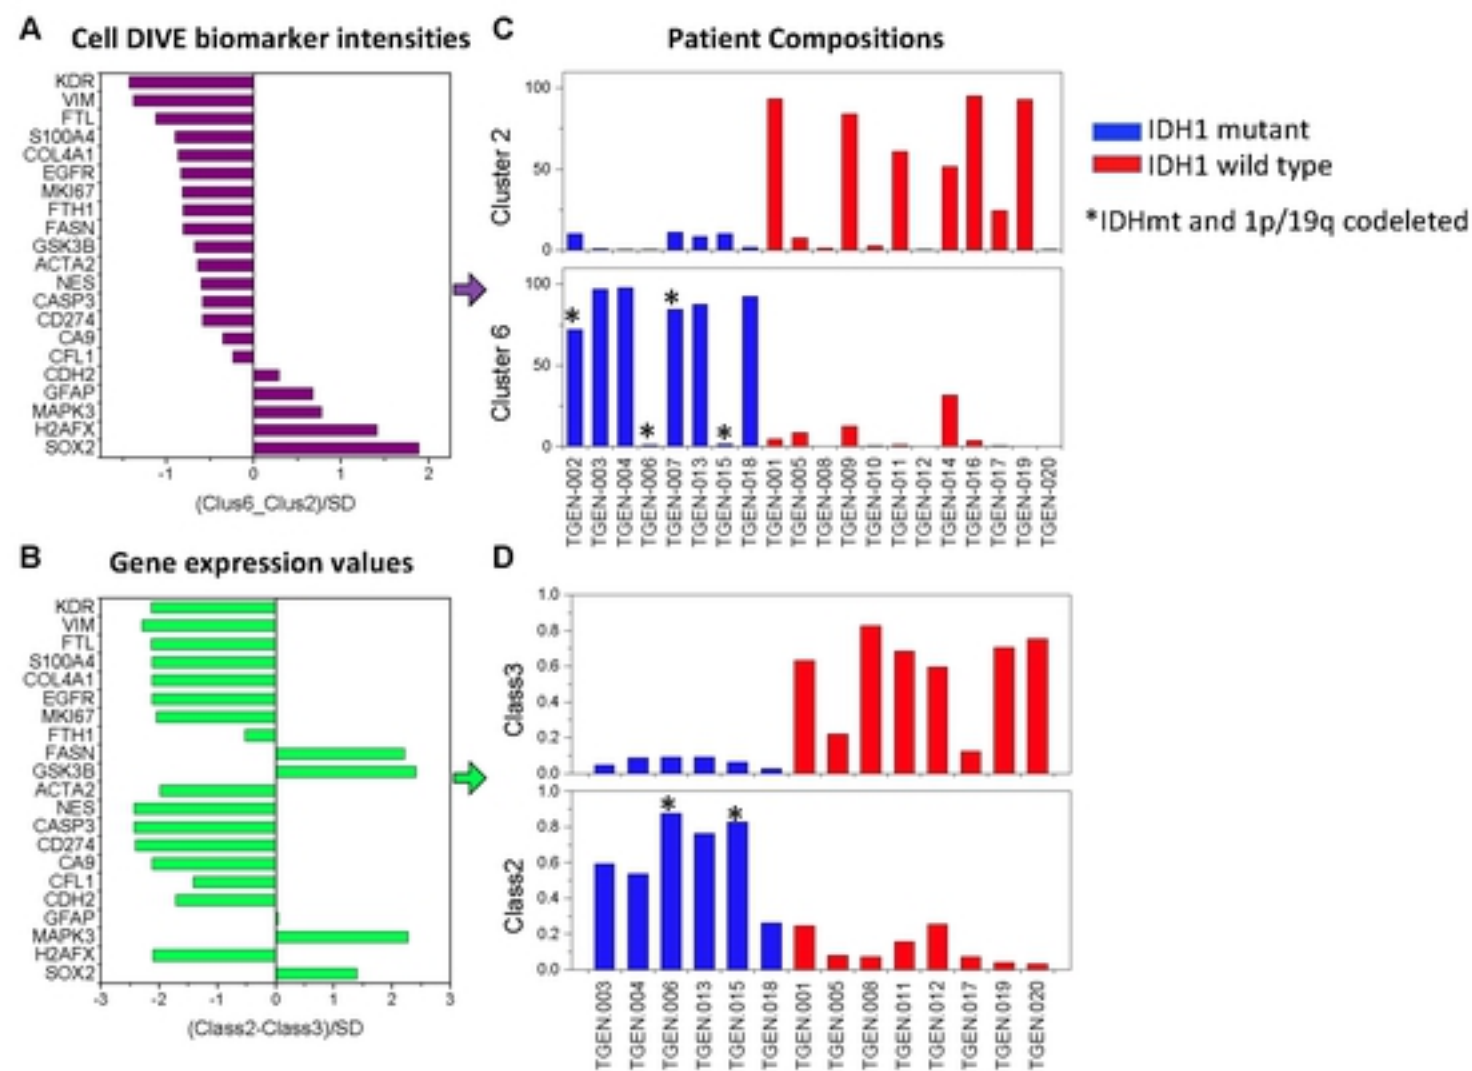

Figure 5



**Figure 8:** Multiscale modality integration including IDH1 mutation, clinical data, MRI, RNA and protein expression for the angiogenesis markers and corresponding cell clusters.

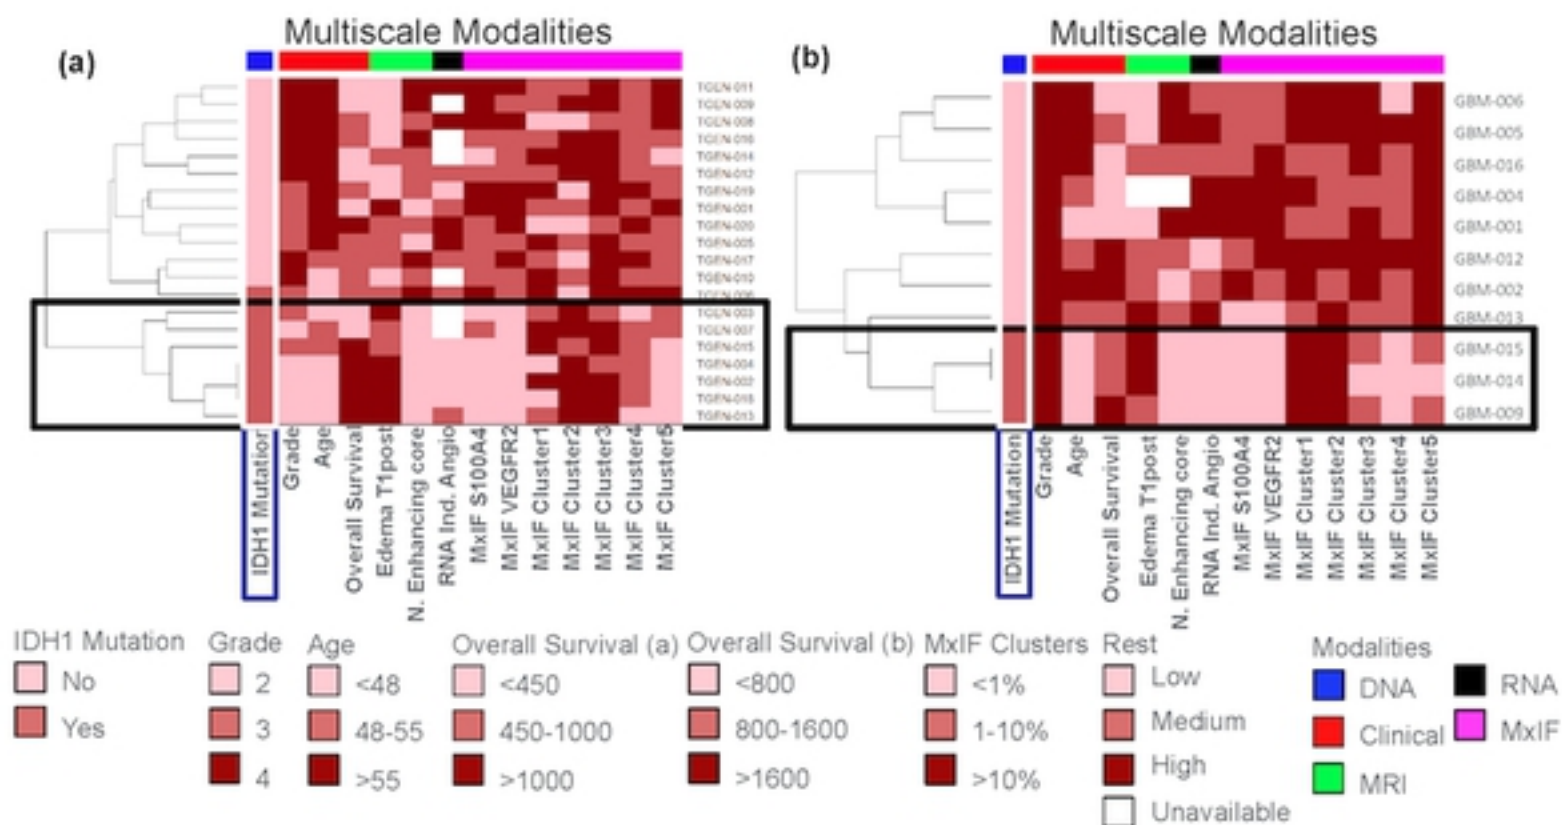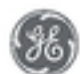

Figure 8

Figure 4: Cell cluster composition and oncoprint of treatment naive gliomas

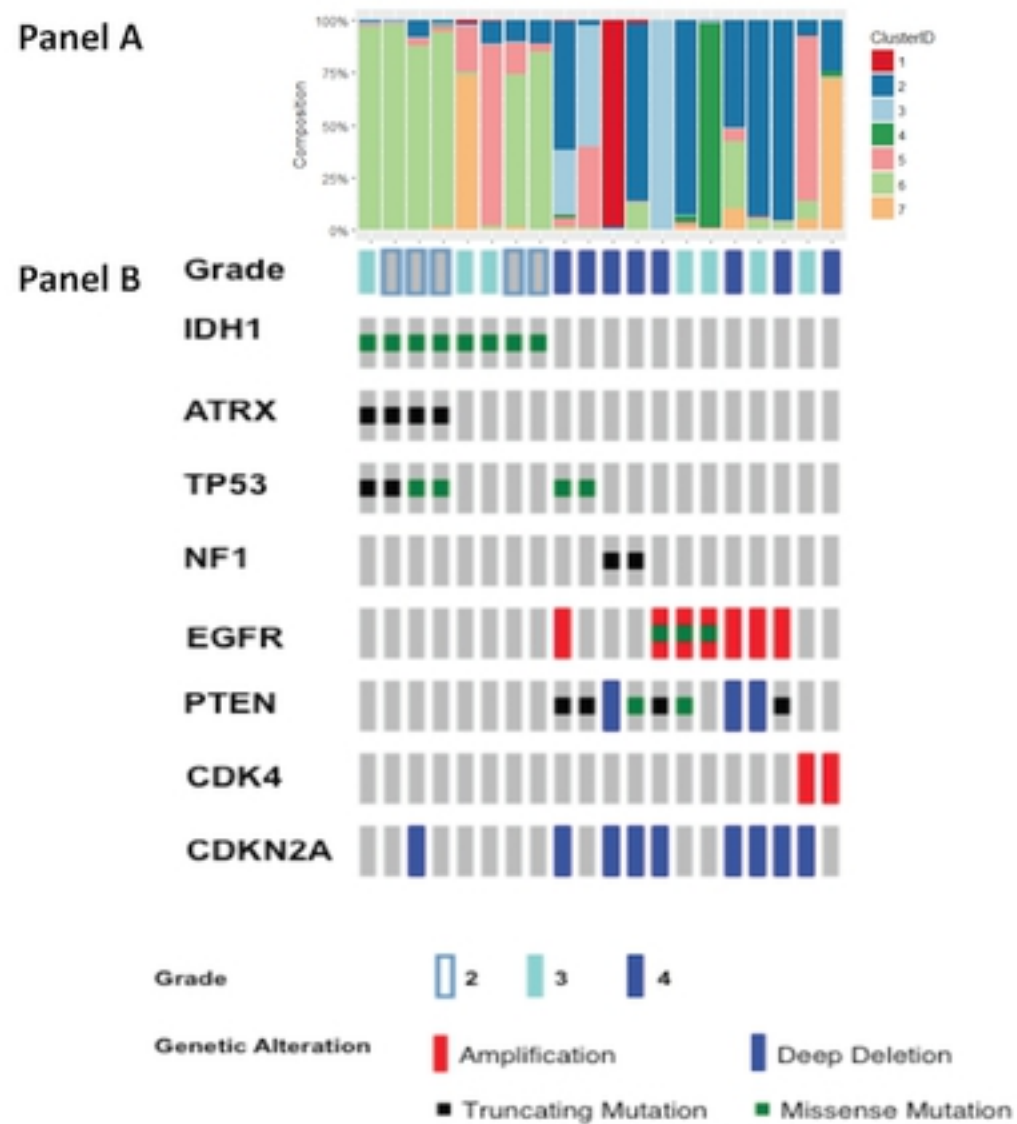

Figure 4
